# Supplementary material for: Postsynthetic modifications of [2,2,2-(H)(PPh3)2-closo-2,1-RhSB8H8] with Lewis bases: cluster modular tuning
Source: Royal Society of Chemistry journal article supplement (doi:10.1039/c6dt00856a), 2016-01-01
Supplement: c6dt00856a1.pdf [file c6dt00856a1.pdf]

## Electronic supplementary information

### **Postsynthetic Modifications of [2,2,2-(H)(PPh<sub>3</sub>)<sub>2</sub>-*closo*-2,1-RhSB<sub>8</sub>H<sub>8</sub>] (1) with Lewis Bases: Cluster Modular Tuning**

Susana Luaces, Vincenzo Passarelli, María José Artigas, Fernando J. Lahoz, Luis A. Oro,  
and Ramón Macías.

Departamento de Química Inorgánica, Instituto de Síntesis Química y Catálisis  
Homogénea (ISQCH), Universidad de Zaragoza-CSIC, C/Pedro Cerbuna 12, ES-  
50009 Zaragoza, Spain.

Centro Universitario de la Defensa, Ctra. Huesca s/n, ES-50090 Zaragoza, Spain.

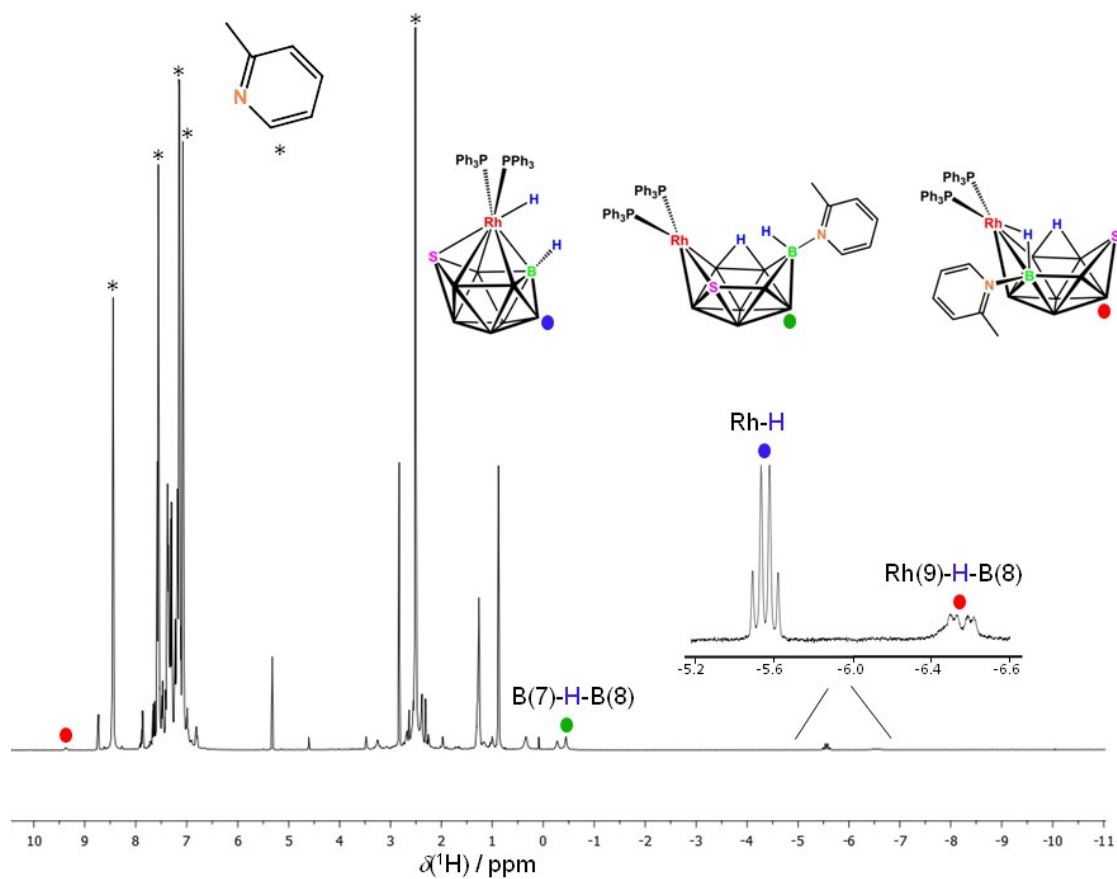

**Figure S1.**  $^1\text{H}\{-^{11}\text{B(BB)}\}$  NMR data in  $\text{CD}_2\text{Cl}_2$  at 283 K after the treatment of 10.4 mg of compound **1** (blue circles) with 10 equiv. of 2-Mepy (asterisk) to give the *arachno*-6,5-isomer (green circles) and the *arachno*-9,6-isomer (red circles) as major and minor products, respectively.

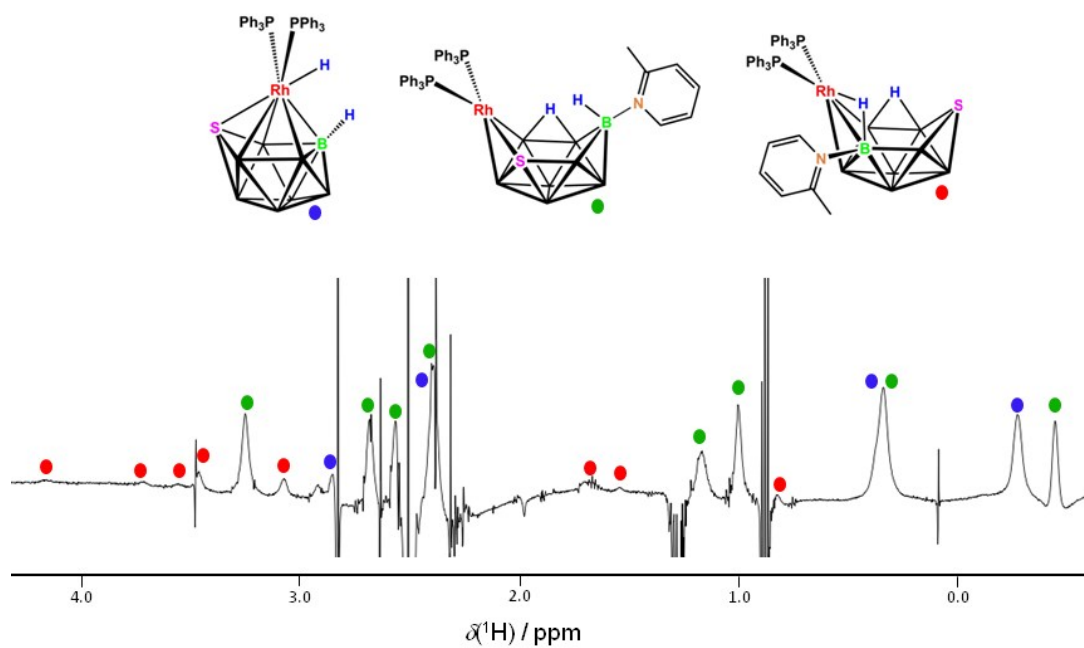

**Figure S2.** Spectrum that results when the  $^1\text{H}\{-^{11}\text{B}(\text{off})\}$  NMR spectrum is subtracted from the  $^1\text{H}\{-^{11}\text{B}(\text{BB})\}$  spectrum illustrated in Figure S1: only the resonances of the hydrogen atoms bound directly to boron atoms appear in the spectrum.

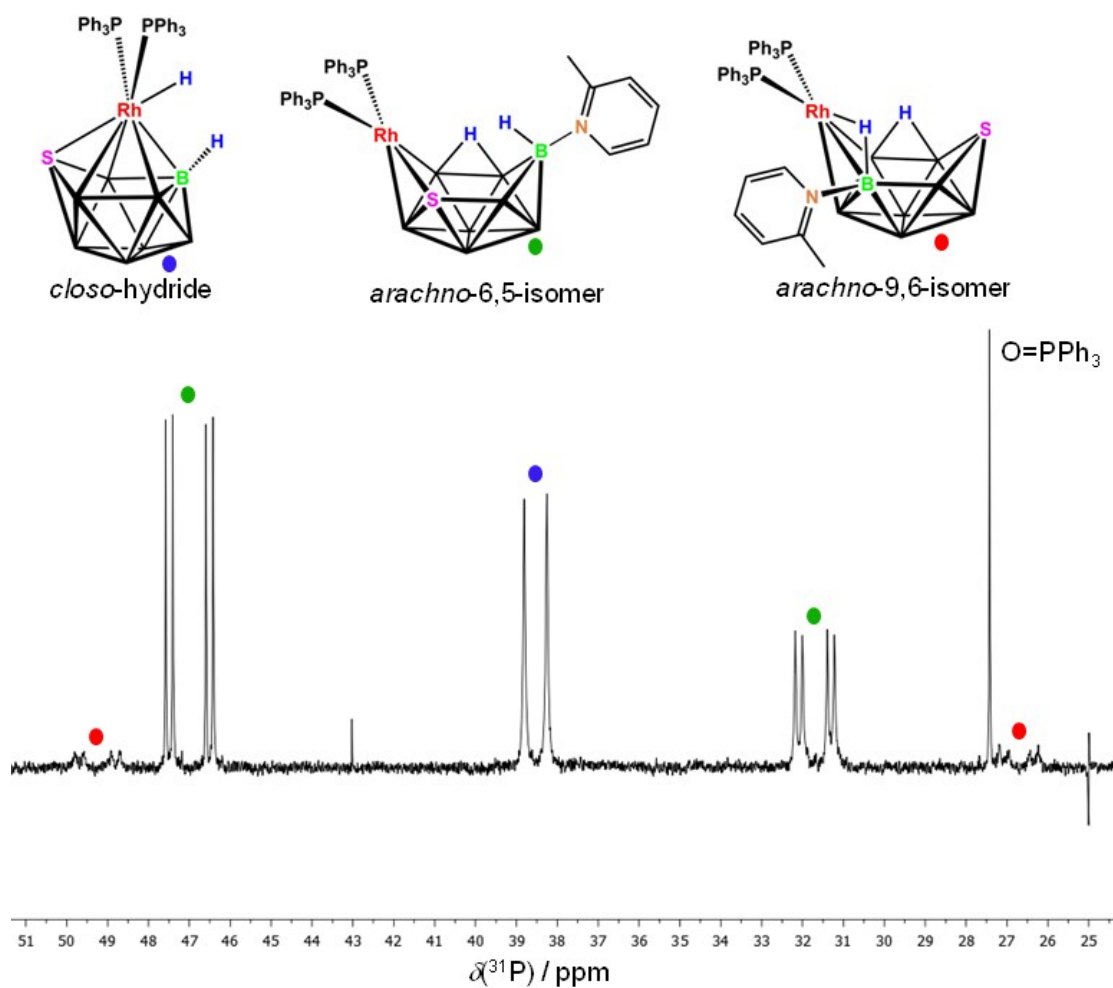

**Figure S3.**  $^{31}\text{P}\{-^1\text{H}\}$  NMR spectrum in  $\text{CD}_2\text{Cl}_2$  at 283 K after the treatment of 10.4 mg of compound **1** (blue circles) with 10 equiv. of 2-Mepy to give the *arachno*-6,5-isomer (green circles) and the *arachno*-9,6-isomer (red circles) as major and minor products, respectively.

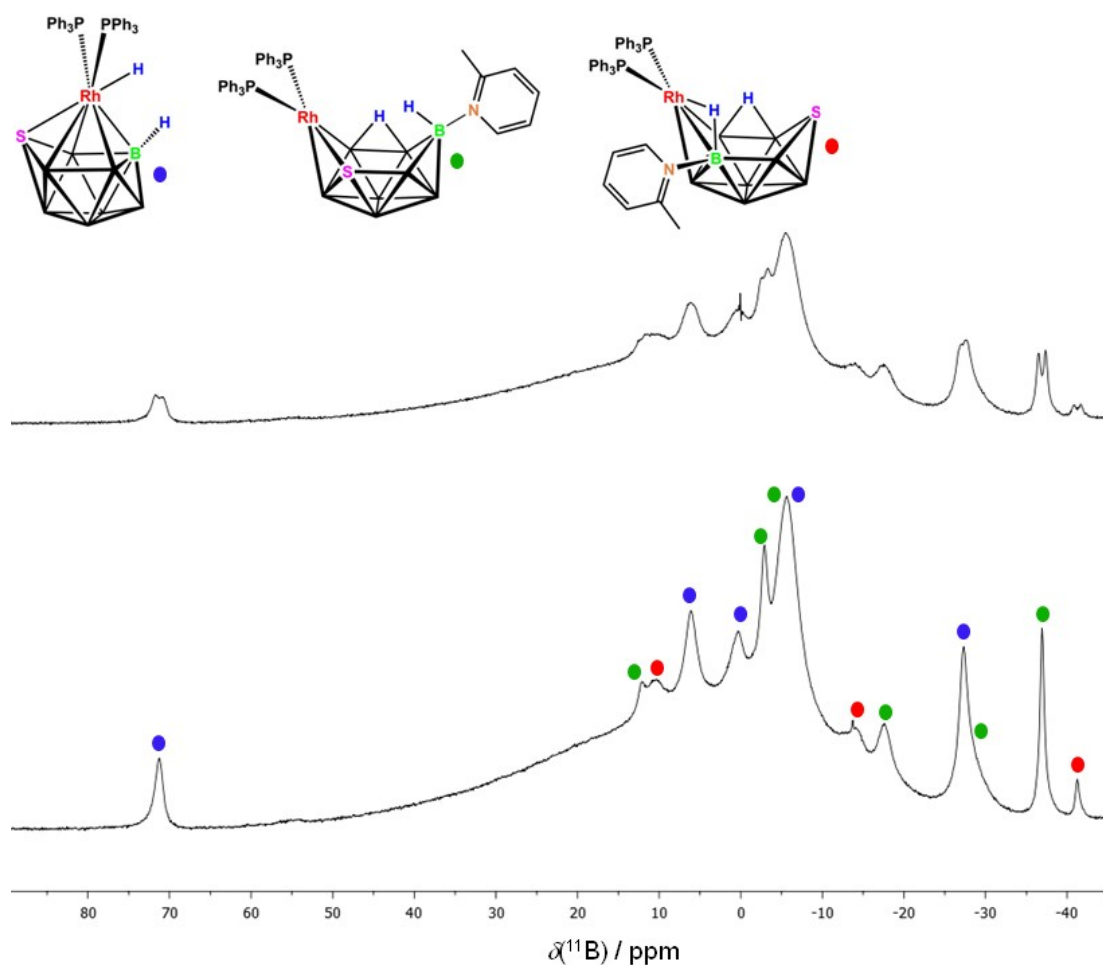

**Figure S4.**  $^{11}\text{B}\{-^1\text{H}\}$  NMR data in  $\text{CD}_2\text{Cl}_2$  at 283 K after the treatment of 10.4 mg of compound **1** (blue circles) with 10 equiv. of 2- Mepy to give the *arachno*-6,5-isomer (green circles) and the *arachno*-9,6-isomer (red circles) as major and minor products, respectively.

**1. Tables of the optimized geometries (Cartesian coordinates, in Angstroms). Energies (in Hartrees) in parenthesis.**

**Table S1.**  $[\text{6,6}-(\text{PPh}_3)_2\text{-9}-(\text{PPh}_3)\text{-arachno-6,5-RhSB}_8\text{H}_9]$  (**2**) (-3820.95865915)

|    | <b>x</b>    | <b>y</b>    | <b>z</b>    |
|----|-------------|-------------|-------------|
| Rh | -1.08481200 | -0.08041700 | -1.04446500 |
| S  | 0.41554300  | 1.21604000  | -2.46181100 |
| P  | -1.94117400 | 1.87000800  | 0.04483400  |
| P  | -2.49095800 | -1.70045400 | -0.12845000 |
| P  | 4.37067900  | -0.23395900 | -0.00688400 |
| B  | 1.88589300  | -1.96101400 | -1.47556400 |

|   |             |             |             |
|---|-------------|-------------|-------------|
| B | 2.66114800  | -0.80843600 | -2.55059500 |
| B | 2.30263300  | 0.85222200  | -2.20268600 |
| B | 2.62444400  | -0.32747100 | -0.87146100 |
| B | -0.16902800 | -0.66143100 | -3.04426600 |
| B | 1.50578600  | -0.02047000 | -3.60514900 |
| B | 1.24188000  | -1.70205400 | -3.14400500 |
| H | -0.46915400 | -2.97615600 | -1.80198300 |
| H | 2.36441700  | -3.01940100 | -1.20053000 |
| H | 1.34987800  | -2.52381500 | -4.00077800 |
| H | -0.99299500 | -0.64465200 | -3.90641800 |
| H | 3.74868000  | -1.08650700 | -2.94837000 |
| H | 1.66606500  | 0.34755300  | -4.72309200 |
| H | 2.99109500  | 1.79079500  | -2.46432800 |
| H | 0.79434400  | -1.74859900 | -0.75244200 |
| H | 1.84263700  | -0.02103500 | -0.02185000 |
| B | 0.06458100  | -1.91324400 | -1.83721200 |
| C | 4.79219800  | 1.49524900  | 0.45373200  |
| C | 6.12685000  | 1.89769900  | 0.63053200  |
| C | 3.76413100  | 2.42947700  | 0.65034800  |
| C | 6.42428100  | 3.20786100  | 1.00722500  |
| H | 6.93532500  | 1.19294200  | 0.46154600  |
| C | 4.06691800  | 3.73946200  | 1.02430200  |
| H | 2.73036300  | 2.14326100  | 0.49034700  |
| C | 5.39454700  | 4.13035300  | 1.20475600  |
| H | 7.46052200  | 3.50828700  | 1.13685400  |
| H | 3.25904400  | 4.45300600  | 1.15510500  |
| H | 5.62808800  | 5.15288300  | 1.48946100  |
| C | 4.42392800  | -1.18203600 | 1.56940500  |
| C | 5.13367800  | -0.71930000 | 2.68903200  |
| C | 3.76080900  | -2.41796900 | 1.64243800  |
| C | 5.18669500  | -1.48283300 | 3.85573100  |
| H | 5.63998600  | 0.23950300  | 2.65580200  |
| C | 3.82557600  | -3.18204900 | 2.80950200  |
| H | 3.19258800  | -2.78057700 | 0.79268700  |
| C | 4.53706300  | -2.71734200 | 3.91714000  |
| H | 5.73592400  | -1.11077000 | 4.71641100  |
| H | 3.31203500  | -4.13842500 | 2.84839800  |
| H | 4.58275400  | -3.31217900 | 4.82557600  |
| C | 5.81405200  | -0.80820400 | -0.98362000 |
| C | 6.54723900  | -1.94813200 | -0.62944400 |
| C | 6.16691600  | -0.09416100 | -2.14195300 |
| C | 7.62160800  | -2.36564800 | -1.41898700 |
| H | 6.28400700  | -2.51183900 | 0.25935600  |
| C | 7.24186200  | -0.51259200 | -2.92322200 |
| H | 5.59853500  | 0.78362400  | -2.43485100 |
| C | 7.97107000  | -1.64943400 | -2.56345200 |
| H | 8.18284300  | -3.25178300 | -1.13559100 |
| H | 7.50483200  | 0.04506600  | -3.81763700 |
| H | 8.80660400  | -1.97614900 | -3.17657300 |
| C | -0.93786900 | 3.44393700  | -0.07352400 |

|   |             |             |             |
|---|-------------|-------------|-------------|
| C | -0.84200400 | 4.07546500  | -1.32699500 |
| C | -0.28545600 | 4.03389800  | 1.01870900  |
| C | -0.11593100 | 5.25539400  | -1.48217300 |
| H | -1.34672700 | 3.64946700  | -2.18825400 |
| C | 0.43626200  | 5.22198200  | 0.86309500  |
| H | -0.35243700 | 3.58538400  | 2.00358000  |
| C | 0.52657100  | 5.83567900  | -0.38620300 |
| H | -0.05623500 | 5.72231400  | -2.46154400 |
| H | 0.91303400  | 5.67364100  | 1.73010200  |
| H | 1.08556800  | 6.76008200  | -0.50515900 |
| C | -2.17814400 | 1.74003900  | 1.87807800  |
| C | -3.33311100 | 2.12103900  | 2.57282600  |
| C | -1.09496300 | 1.22142200  | 2.61072800  |
| C | -3.39576600 | 2.00489300  | 3.96403700  |
| H | -4.19709500 | 2.49238900  | 2.03398800  |
| C | -1.15240500 | 1.11997000  | 4.00078700  |
| H | -0.19983100 | 0.90047900  | 2.08272700  |
| C | -2.30568100 | 1.51519200  | 4.68299900  |
| H | -4.30426200 | 2.29761400  | 4.48373800  |
| H | -0.29989100 | 0.72673800  | 4.54872600  |
| H | -2.35620400 | 1.43223400  | 5.76549100  |
| C | -3.53225300 | 2.51526500  | -0.65647100 |
| C | -4.12446400 | 3.71311700  | -0.22011700 |
| C | -4.11094300 | 1.83168100  | -1.73562000 |
| C | -5.29061200 | 4.18834700  | -0.81981500 |
| H | -3.66362300 | 4.28606600  | 0.57929100  |
| C | -5.27339400 | 2.31381100  | -2.34402200 |
| H | -3.62997600 | 0.92771600  | -2.10230700 |
| C | -5.86991900 | 3.48699700  | -1.88122900 |
| H | -5.74013600 | 5.11320500  | -0.46755700 |
| H | -5.70569900 | 1.77418200  | -3.18255900 |
| H | -6.77368000 | 3.86333300  | -2.35346900 |
| C | -3.85747200 | -1.27010900 | 1.07391400  |
| C | -4.99327700 | -0.60447300 | 0.58102100  |
| C | -3.82597400 | -1.60591200 | 2.43468500  |
| C | -6.06261400 | -0.28900300 | 1.41800200  |
| H | -5.05466800 | -0.34542800 | -0.47024500 |
| C | -4.89798100 | -1.29032600 | 3.27436100  |
| H | -2.97032600 | -2.12681800 | 2.84848400  |
| C | -6.02031000 | -0.63397700 | 2.77108400  |
| H | -6.93148300 | 0.22004000  | 1.00868900  |
| H | -4.85168400 | -1.56637600 | 4.32474400  |
| H | -6.85609900 | -0.39596600 | 3.42413100  |
| C | -3.50876600 | -2.68150000 | -1.33848100 |
| C | -4.52500100 | -3.55028500 | -0.89955200 |
| C | -3.29548200 | -2.54062300 | -2.71584900 |
| C | -5.29226800 | -4.26945800 | -1.81540800 |
| H | -4.72398100 | -3.65978500 | 0.16226000  |
| C | -4.06968000 | -3.25665300 | -3.63320900 |
| H | -2.52258300 | -1.86918900 | -3.06913100 |

|   |             |             |             |
|---|-------------|-------------|-------------|
| C | -5.06631800 | -4.12383500 | -3.18686800 |
| H | -6.07098600 | -4.93822800 | -1.45753900 |
| H | -3.88762400 | -3.13319100 | -4.69751800 |
| H | -5.66780300 | -4.68086800 | -3.90071500 |
| C | -1.56114900 | -2.98430700 | 0.84513300  |
| C | -1.71565800 | -4.36578300 | 0.66728200  |
| C | -0.64658100 | -2.53163700 | 1.81021600  |
| C | -0.98903300 | -5.26942200 | 1.44648700  |
| H | -2.39514900 | -4.74506700 | -0.08742500 |
| C | 0.06507600  | -3.43358500 | 2.60208500  |
| H | -0.49474900 | -1.46474900 | 1.94164800  |
| C | -0.10449500 | -4.80841000 | 2.42177400  |
| H | -1.11710800 | -6.33697400 | 1.28692600  |
| H | 0.76006200  | -3.06026800 | 3.34934700  |
| H | 0.45179400  | -5.51469200 | 3.03314800  |

**Table S2.** [9,9-(PPh<sub>3</sub>)<sub>2</sub>-8-(PPh<sub>3</sub>)-*arachno*-9,6-RhSB<sub>8</sub>H<sub>9</sub>] (-3820.95000167)

|    | <b>x</b>    | <b>y</b>    | <b>z</b>    |
|----|-------------|-------------|-------------|
| H  | -3.84923300 | 0.22640000  | -3.00585800 |
| H  | -3.24685200 | -2.60192500 | -2.15680100 |
| H  | -1.18669500 | 0.45824000  | -1.19995500 |
| H  | -0.84216200 | -2.94213900 | -0.75719700 |
| H  | -2.74001200 | -1.86629200 | -5.01470700 |
| H  | -0.74712300 | -3.51425900 | -3.63266900 |
| H  | 0.66204100  | -0.46584200 | -3.20680000 |
| H  | 1.52900200  | -2.18179800 | -2.74219300 |
| H  | 0.39870000  | -1.10579800 | -5.14650000 |
| B  | -1.97046100 | -0.54724300 | -1.27750000 |
| B  | -2.74707500 | -0.20477900 | -2.85318200 |
| B  | -2.35817800 | -1.86286200 | -2.44082400 |
| B  | -0.87507800 | -1.99089000 | -1.47771400 |
| B  | -2.13688500 | -1.41413600 | -4.09621400 |
| B  | -0.88635600 | -2.39373200 | -3.24681500 |
| B  | 0.51639900  | -1.58062800 | -2.56328700 |
| B  | -0.21576700 | -0.98632800 | -4.13296100 |
| P  | 1.09370100  | 1.96853500  | 0.02896100  |
| P  | 2.26194400  | -1.54765400 | 0.00292200  |
| S  | -1.54364200 | 0.43317400  | -4.24831100 |
| Rh | 0.41709800  | -0.30729700 | -0.71342000 |
| C  | 0.22572600  | 3.27993800  | -0.97183100 |
| C  | -0.05941900 | 4.56332500  | -0.47828900 |
| C  | -0.10949000 | 2.98555900  | -2.30205700 |
| C  | -0.65781900 | 5.52317400  | -1.29761600 |
| H  | 0.18146400  | 4.82054800  | 0.54722300  |
| C  | -0.70362500 | 3.94646700  | -3.12351300 |
| H  | 0.08172800  | 1.99296700  | -2.69663100 |
| C  | -0.97939100 | 5.21951000  | -2.62292200 |
| H  | -0.86913200 | 6.51183400  | -0.89745500 |



|   |             |             |             |
|---|-------------|-------------|-------------|
| H | -0.95769900 | 3.68938600  | -4.14783000 |
| H | -1.44482300 | 5.96840200  | -3.25832000 |
| C | 2.86705700  | 2.44412300  | -0.28991300 |
| C | 3.86716600  | 2.16009500  | 0.65565200  |
| C | 3.25216700  | 3.02160600  | -1.51136400 |
| C | 5.20638500  | 2.44795200  | 0.38820400  |
| H | 3.60462300  | 1.72446100  | 1.61243200  |
| C | 4.59347000  | 3.30309500  | -1.77897500 |
| H | 2.50519300  | 3.26484200  | -2.25931800 |
| C | 5.57670600  | 3.01761400  | -0.83074300 |
| H | 5.95928100  | 2.22128000  | 1.13839700  |
| H | 4.86503700  | 3.75498500  | -2.72957900 |
| H | 6.62007200  | 3.23973600  | -1.03812800 |
| C | 0.81521300  | 2.58872500  | 1.75924600  |
| C | 1.56179600  | 3.62241100  | 2.34996600  |
| C | -0.23467600 | 2.01929500  | 2.49431500  |
| C | 1.26642200  | 4.06761200  | 3.63991800  |
| H | 2.38139800  | 4.07952900  | 1.80500900  |
| C | -0.53605200 | 2.46913200  | 3.78128800  |
| H | -0.81178700 | 1.20736300  | 2.06251400  |
| C | 0.21625600  | 3.49298900  | 4.35918100  |
| H | 1.85805300  | 4.86562000  | 4.08126600  |
| H | -1.35273700 | 2.00901200  | 4.32999000  |
| H | -0.01194200 | 3.84037400  | 5.36353000  |
| C | 3.74317100  | -1.68890900 | -1.09960000 |
| C | 4.62093800  | -2.78381600 | -1.05227500 |
| C | 4.01361800  | -0.64419300 | -1.99396800 |
| C | 5.74591700  | -2.82618200 | -1.87840500 |
| H | 4.42308200  | -3.60999200 | -0.37665800 |
| C | 5.14074100  | -0.68459000 | -2.81509800 |
| H | 3.33161800  | 0.19722700  | -2.05126800 |
| C | 6.00899900  | -1.77642400 | -2.76048500 |
| H | 6.41273600  | -3.68351200 | -1.83516800 |
| H | 5.33349000  | 0.13502500  | -3.50181900 |
| H | 6.88242700  | -1.81309300 | -3.40639600 |
| C | 3.00219300  | -0.99862600 | 1.61659200  |
| C | 2.13600500  | -0.52569100 | 2.61471500  |
| C | 4.37529400  | -1.06848300 | 1.89774100  |
| C | 2.62644000  | -0.12593700 | 3.85963000  |
| H | 1.07108500  | -0.46799800 | 2.41391200  |
| C | 4.86678100  | -0.66654200 | 3.14163000  |
| H | 5.06697400  | -1.42799000 | 1.14382500  |
| C | 3.99571300  | -0.19223100 | 4.12513200  |
| H | 1.93781300  | 0.24948600  | 4.61144300  |
| H | 5.93410700  | -0.72332600 | 3.34027000  |
| H | 4.38167300  | 0.12415100  | 5.09072100  |
| C | 1.89602800  | -3.33511200 | 0.40404700  |
| C | 1.63503800  | -4.24892600 | -0.63221700 |
| C | 1.85849400  | -3.80532800 | 1.72664300  |
| C | 1.34748700  | -5.58436100 | -0.35264300 |

|   |             |             |             |
|---|-------------|-------------|-------------|
| H | 1.65061300  | -3.91880400 | -1.66345200 |
| C | 1.56297900  | -5.14323900 | 2.00507800  |
| H | 2.07468900  | -3.13600600 | 2.55128600  |
| C | 1.30597000  | -6.03810000 | 0.96726600  |
| H | 1.14867400  | -6.26829100 | -1.17324100 |
| H | 1.54830500  | -5.48374700 | 3.03767300  |
| H | 1.07939100  | -7.07898200 | 1.18290500  |
| P | -3.28574600 | -0.43249000 | 0.17868400  |
| C | -2.69129700 | -0.85537600 | 1.87434700  |
| C | -3.23637900 | -0.26099500 | 3.02425900  |
| C | -1.72721300 | -1.86675700 | 2.02026000  |
| C | -2.82993300 | -0.67528600 | 4.29401500  |
| H | -3.97432300 | 0.52861000  | 2.93463800  |
| C | -1.33121000 | -2.28315900 | 3.29396700  |
| H | -1.28796600 | -2.32770600 | 1.14288100  |
| C | -1.87920200 | -1.68929500 | 4.43180400  |
| H | -3.26237100 | -0.20774000 | 5.17488600  |
| H | -0.59119200 | -3.07271400 | 3.38529000  |
| H | -1.56894000 | -2.01468500 | 5.42128400  |
| C | -4.05034300 | 1.23350000  | 0.32448700  |
| C | -5.30888000 | 1.40465000  | 0.92873700  |
| C | -3.37171000 | 2.35851600  | -0.16406800 |
| C | -5.86578300 | 2.67740000  | 1.05291500  |
| H | -5.86344900 | 0.54249700  | 1.28625100  |
| C | -3.93219600 | 3.63131800  | -0.03706700 |
| H | -2.41566300 | 2.24781900  | -0.66123400 |
| C | -5.17648000 | 3.79336800  | 0.57249500  |
| H | -6.84122900 | 2.79445000  | 1.51733600  |
| H | -3.39112900 | 4.48912200  | -0.42436000 |
| H | -5.61357200 | 4.78403000  | 0.66545100  |
| C | -4.72068200 | -1.55834700 | -0.07069300 |
| C | -4.83849700 | -2.75649500 | 0.64706900  |
| C | -5.69356600 | -1.23789100 | -1.03229900 |
| C | -5.90991500 | -3.61899100 | 0.40736000  |
| H | -4.09762000 | -3.02443100 | 1.39227900  |
| C | -6.76258100 | -2.10114500 | -1.26528200 |
| H | -5.61250400 | -0.32116700 | -1.60579200 |
| C | -6.87333500 | -3.29414000 | -0.54732900 |
| H | -5.98724000 | -4.54536600 | 0.96980600  |
| H | -7.50558200 | -1.84276100 | -2.01458800 |
| H | -7.70588200 | -3.96715800 | -0.73360100 |

**Table S3.** [6,6-(PH<sub>3</sub>)<sub>2</sub>-9-(PCy<sub>3</sub>)-*arachno*-6,5-RhSB<sub>8</sub>H<sub>9</sub>]: PH<sub>3</sub> model of compound **3** (-2445.55557138)

|   | <b>x</b>   | <b>y</b>   | <b>z</b>   |
|---|------------|------------|------------|
| C | 1.78728300 | 4.65099400 | 1.62718100 |
| C | 1.58336600 | 3.51408200 | 2.63695900 |
| C | 1.19852200 | 2.19714100 | 1.94083300 |

|   |             |             |             |
|---|-------------|-------------|-------------|
| C | 2.81697800  | 4.25726800  | 0.55914600  |
| C | 2.43435400  | 2.94411300  | -0.14698600 |
| C | 2.24657500  | 1.79867000  | 0.87540400  |
| C | 3.16329000  | -0.09627800 | -1.22710600 |
| C | 1.98500200  | -1.07709700 | 1.50826300  |
| C | 3.09766500  | -1.45241500 | -1.96544900 |
| C | 1.62648400  | -2.53339400 | 1.13313500  |
| C | 4.03659000  | -1.44557800 | -3.18441500 |
| C | 1.51174900  | -3.40676100 | 2.39484300  |
| C | 3.29769900  | -1.04412300 | 2.32072500  |
| C | 4.61683300  | 0.18811900  | -0.78399500 |
| C | 5.56099100  | 0.19731900  | -2.00014800 |
| C | 3.18274600  | -1.91956200 | 3.58218000  |
| C | 5.48351600  | -1.11715600 | -2.78993600 |
| C | 2.79389400  | -3.36410300 | 3.23785700  |
| H | -4.13672100 | -0.08975300 | -2.95150500 |
| H | -3.28771200 | 2.55265400  | -1.37826500 |
| H | -1.84229700 | 1.69292900  | -3.75692700 |
| H | -1.84348000 | 1.48330500  | -0.37139200 |
| H | -1.60744500 | -1.26012200 | -4.01729100 |
| H | -0.41242400 | 2.65025600  | -1.27734300 |
| H | 0.82887400  | 4.87963700  | 1.13983400  |
| H | 0.22129900  | 2.31063000  | 1.45636600  |
| H | 0.71951000  | 0.42257700  | -2.88345800 |
| H | 2.10470400  | 5.56585900  | 2.14318100  |
| H | 1.50479000  | 3.08843400  | -0.70599000 |
| H | 0.80661300  | 3.78188100  | 3.36425100  |
| H | 2.91799100  | 5.05462200  | -0.18761300 |
| H | -0.66517300 | -0.11370200 | 0.44076900  |
| H | 0.06263600  | -2.32931700 | -1.81210100 |
| H | 1.08770200  | 1.40894400  | 2.69506200  |
| H | 3.20866100  | 2.69141800  | -0.87936100 |
| H | 2.51067000  | 3.36510600  | 3.21027600  |
| H | 3.80481600  | 4.14332800  | 1.03103500  |
| H | 2.87877700  | 0.67289000  | -1.96045700 |
| H | 2.07599000  | -1.67306600 | -2.28084600 |
| H | 1.17910700  | -0.71876100 | 2.16638500  |
| H | 3.20744400  | 1.65290300  | 1.38840900  |
| H | 0.69296600  | -2.56406500 | 0.56559700  |
| H | 3.67477500  | -0.70331300 | -3.91018500 |
| H | 0.66428000  | -3.05450400 | 3.00159600  |
| H | 3.98982700  | -2.41979000 | -3.68654700 |
| H | 3.40526600  | -2.25663600 | -1.28405200 |
| H | 3.56297300  | -0.02183800 | 2.61186400  |
| H | 5.28949300  | 1.03577900  | -2.65808900 |
| H | 4.69858200  | 1.14229500  | -0.25337400 |
| H | 2.42466500  | -1.48713700 | 4.25172000  |
| H | 2.40592600  | -2.95036100 | 0.48256100  |
| H | 1.27925600  | -4.43899300 | 2.10486800  |
| H | 4.12246400  | -1.42084700 | 1.70243300  |

|    |             |             |             |
|----|-------------|-------------|-------------|
| H  | 4.94644000  | -0.59012400 | -0.08437200 |
| H  | 6.11989400  | -1.06110700 | -3.68194500 |
| H  | 4.13258500  | -1.89815600 | 4.13133700  |
| H  | 2.66869900  | -3.95253000 | 4.15542200  |
| H  | 6.58932100  | 0.38350600  | -1.66499000 |
| H  | 5.88431200  | -1.93362700 | -2.17076600 |
| H  | 3.61333600  | -3.83398800 | 2.67398100  |
| B  | -2.74355600 | 1.48882700  | -1.33898900 |
| B  | -3.16723500 | 0.05033300  | -2.27560000 |
| B  | -1.80111300 | 1.03423300  | -2.76481700 |
| B  | -1.59068400 | -0.70550100 | -2.96779400 |
| B  | -0.89471800 | 1.56102600  | -1.29397400 |
| B  | -0.28259600 | 0.23231100  | -2.26084500 |
| B  | -0.56478200 | -1.34154600 | -1.58769000 |
| B  | -0.01550900 | 0.04267100  | -0.54903500 |
| P  | -5.02739500 | 1.51348700  | 0.58826300  |
| P  | -4.22886200 | -1.66708700 | 1.59952800  |
| P  | 1.83863800  | 0.14334600  | 0.08135600  |
| S  | -2.46213100 | -1.72039200 | -1.46439600 |
| Rh | -3.65512700 | -0.15065600 | -0.07284700 |
| H  | -4.24358300 | -3.06025900 | 1.33324300  |
| H  | -3.44599600 | -1.75226600 | 2.78296000  |
| H  | -5.48404000 | -1.62609200 | 2.26335700  |
| H  | -4.52222400 | 2.71444900  | 1.14952800  |
| H  | -5.84878900 | 2.11698700  | -0.39316900 |
| H  | -6.04594800 | 1.30035400  | 1.55803400  |

**Table S4.** [6,6-(PPh<sub>3</sub>)<sub>2</sub>-9-(2-Mepy)-*arachno*-6,5-RhSB<sub>8</sub>H<sub>9</sub>] (**4**) (-3072.28412376)

|    | <b>x</b>    | <b>y</b>    | <b>z</b>    |
|----|-------------|-------------|-------------|
| Rh | -0.07308700 | -0.32345000 | -0.75941400 |
| P  | 1.76075900  | -1.45754600 | 0.09582500  |
| P  | 0.38825900  | 1.89694400  | -0.00009600 |
| S  | -1.68020400 | 0.42810000  | -2.42593900 |
| B  | -2.61024800 | -1.16593800 | -3.22700700 |
| B  | -0.88054400 | -1.47002200 | -2.55153800 |
| B  | -2.17521700 | -2.64387100 | -2.36114600 |
| B  | -3.68663100 | -1.77688000 | -1.99039300 |
| B  | -0.99729600 | -2.39634800 | -1.06318000 |
| B  | -2.80936400 | -2.52912400 | -0.67411400 |
| B  | -3.74594400 | -0.87143900 | -0.49859000 |
| B  | -3.51892000 | -0.05578700 | -2.09056700 |
| C  | 2.44691500  | -2.61912200 | -1.18203200 |
| C  | 2.61471600  | -2.11754700 | -2.48402000 |
| H  | 2.30872800  | -1.09921700 | -2.70438900 |
| C  | 3.14023500  | -2.91933400 | -3.49710800 |
| H  | 3.26313100  | -2.51092900 | -4.49673100 |
| C  | 3.48191700  | -4.24726800 | -3.23303800 |
| H  | 3.87909900  | -4.87766900 | -4.02429000 |

|   |             |             |             |
|---|-------------|-------------|-------------|
| C | 3.29345800  | -4.76372400 | -1.95121500 |
| H | 3.53866500  | -5.80139600 | -1.73961800 |
| C | 2.78287500  | -3.95648200 | -0.93152100 |
| H | 2.63462800  | -4.38327300 | 0.05374400  |
| C | 1.56447000  | -2.51263600 | 1.61812300  |
| C | 0.29596900  | -2.70153700 | 2.18230400  |
| H | -0.56433300 | -2.23827000 | 1.71250200  |
| C | 0.12917200  | -3.47372700 | 3.33511900  |
| H | -0.86497200 | -3.60885600 | 3.75343300  |
| C | 1.23237000  | -4.07211600 | 3.94295500  |
| H | 1.10473200  | -4.67494600 | 4.83833200  |
| C | 2.50513700  | -3.88815400 | 3.39636500  |
| H | 3.37224300  | -4.34553400 | 3.86584400  |
| C | 2.66992200  | -3.11175200 | 2.24941700  |
| H | 3.66750300  | -2.96371000 | 1.84751200  |
| C | 3.30171400  | -0.51863300 | 0.59576900  |
| C | 3.39852600  | 0.02147500  | 1.89015100  |
| H | 2.59195500  | -0.11968900 | 2.60085400  |
| C | 4.53478000  | 0.72235800  | 2.29447100  |
| H | 4.58749500  | 1.11874000  | 3.30543100  |
| C | 5.59921500  | 0.90619000  | 1.41019100  |
| H | 6.48783800  | 1.44700000  | 1.72542000  |
| C | 5.51141100  | 0.38716900  | 0.11889500  |
| H | 6.33167500  | 0.52228700  | -0.58126900 |
| C | 4.37571400  | -0.31882500 | -0.28421700 |
| H | 4.34228000  | -0.73026700 | -1.28646500 |
| C | 0.35802500  | 2.22745200  | 1.82704400  |
| C | 0.17937000  | 1.15181400  | 2.70746000  |
| H | 0.09838300  | 0.14772500  | 2.30271100  |
| C | 0.09224100  | 1.36115800  | 4.08664200  |
| H | -0.04410500 | 0.51225100  | 4.75183400  |
| C | 0.17921400  | 2.65390700  | 4.60393600  |
| H | 0.11279600  | 2.81989600  | 5.67609000  |
| C | 0.33805300  | 3.73762400  | 3.73553000  |
| H | 0.39013600  | 4.74921200  | 4.12985000  |
| C | 0.41643300  | 3.52752100  | 2.35864000  |
| H | 0.50574400  | 4.38120500  | 1.69307900  |
| C | 1.97172200  | 2.61162600  | -0.63778400 |
| C | 2.90343700  | 3.32032200  | 0.13102500  |
| H | 2.74216900  | 3.45744000  | 1.19446200  |
| C | 4.05722700  | 3.84417000  | -0.45875400 |
| H | 4.77306400  | 4.38537400  | 0.15452800  |
| C | 4.29202100  | 3.67415100  | -1.82278600 |
| H | 5.18744100  | 4.08789400  | -2.27935700 |
| C | 3.37410600  | 2.96004000  | -2.59749700 |
| H | 3.55113600  | 2.81433300  | -3.66000700 |
| C | 2.22984400  | 2.42390100  | -2.00816800 |
| H | 1.52756700  | 1.85381100  | -2.61160200 |
| C | -0.84824800 | 3.18430400  | -0.53069600 |
| C | -0.50756500 | 4.35563700  | -1.22076200 |

|   |             |             |             |
|---|-------------|-------------|-------------|
| H | 0.52431300  | 4.54632900  | -1.49533900 |
| C | -1.49058200 | 5.28896100  | -1.56399700 |
| H | -1.20813200 | 6.19028300  | -2.10213700 |
| C | -2.82331600 | 5.06750900  | -1.21966900 |
| H | -3.58601000 | 5.79356100  | -1.48871400 |
| C | -3.17289000 | 3.90191000  | -0.53280000 |
| H | -4.21029600 | 3.71417600  | -0.26867600 |
| C | -2.19554300 | 2.96729500  | -0.19593100 |
| H | -2.48200600 | 2.05446200  | 0.31890100  |
| C | -6.27658700 | -0.66707500 | -0.64865900 |
| H | -6.05612000 | -0.47563000 | -1.68886400 |
| C | -7.57274700 | -0.65741500 | -0.16446200 |
| H | -8.39277600 | -0.46358600 | -0.84698000 |
| C | -7.78396000 | -0.89212300 | 1.19318000  |
| H | -8.78579300 | -0.89277200 | 1.61196900  |
| C | -6.67838400 | -1.12439500 | 2.00339900  |
| H | -6.79997100 | -1.31238100 | 3.06470200  |
| C | -5.38570400 | -1.12808700 | 1.47319900  |
| C | -4.20147700 | -1.38843100 | 2.35680300  |
| H | -3.59624300 | -2.20837000 | 1.95900400  |
| H | -4.53938600 | -1.64361400 | 3.36463300  |
| H | -3.54960400 | -0.51029200 | 2.41677400  |
| N | -5.19708600 | -0.90074000 | 0.13917000  |
| H | -4.74337000 | -2.26343000 | -2.26567800 |
| H | -2.78516600 | -1.11181300 | -4.40062500 |
| H | -2.19368200 | -3.66142200 | -2.98158500 |
| H | -0.05489500 | -1.57824800 | -3.40077700 |
| H | -4.30503200 | 0.70314900  | -2.57563000 |
| H | -3.19391500 | -3.50171500 | -0.09519100 |
| H | -0.35722700 | -3.34880600 | -0.74528000 |
| H | -3.00877000 | -0.29985900 | 0.23860200  |
| H | -1.76280500 | -2.01517800 | -0.05282600 |

**Table S5.** [9,6-(PPh<sub>3</sub>)<sub>2</sub>-8-(2-Mepy)-*arachno*-9,6-RhSB<sub>8</sub>H<sub>9</sub>] (-3072.27589729)

|   | <b>x</b>   | <b>y</b>    | <b>z</b>    |
|---|------------|-------------|-------------|
| C | 2.74500000 | 1.05612700  | -1.12952200 |
| C | 2.04851300 | 1.38344300  | -2.30378900 |
| C | 2.43727600 | 2.46922900  | -3.08915700 |
| C | 3.53237600 | 3.25002900  | -2.71013500 |
| C | 4.23498400 | 2.93147800  | -1.54669300 |
| C | 3.84719600 | 1.84139200  | -0.76338200 |
| C | 3.14506200 | -0.45433200 | 1.35646900  |
| C | 3.01042100 | 0.66047900  | 2.20202700  |
| C | 3.61264800 | 0.67846300  | 3.46010700  |
| C | 4.34825000 | -0.42263500 | 3.90388600  |
| C | 4.47903500 | -1.53899400 | 3.07755500  |

|    |             |             |             |
|----|-------------|-------------|-------------|
| C  | 3.88462200  | -1.55646600 | 1.81385800  |
| C  | 3.22348000  | -1.66687700 | -1.29714500 |
| C  | 4.62325000  | -1.54897900 | -1.35282000 |
| C  | 5.37276100  | -2.36278800 | -2.20082000 |
| C  | 4.73481800  | -3.29899100 | -3.01905600 |
| C  | 3.34614300  | -3.41442400 | -2.97961200 |
| C  | 2.59470200  | -2.60456900 | -2.12337200 |
| C  | 0.19869100  | 2.82311700  | 1.09908400  |
| C  | 0.15392000  | 3.03117100  | 2.48857400  |
| C  | 0.94225000  | 4.01143500  | 3.09308800  |
| C  | 1.79123400  | 4.80736000  | 2.32181700  |
| C  | 1.84659800  | 4.61000600  | 0.94176600  |
| C  | 1.06328600  | 3.62544500  | 0.33568600  |
| C  | -1.39585100 | 2.26026100  | -1.25598700 |
| C  | -1.65915000 | 3.63385400  | -1.39300800 |
| C  | -2.12435200 | 4.15168700  | -2.60323500 |
| C  | -2.33419900 | 3.30657700  | -3.69568600 |
| C  | -2.07300300 | 1.94076300  | -3.57324100 |
| C  | -1.60429400 | 1.42432500  | -2.36336600 |
| C  | -2.30468300 | 1.51979400  | 1.41608800  |
| C  | -3.40089600 | 2.36724100  | 1.19483300  |
| C  | -4.48670100 | 2.37256000  | 2.07442700  |
| C  | -4.49272700 | 1.53639800  | 3.19292400  |
| C  | -3.40535100 | 0.69170400  | 3.42715800  |
| C  | -2.32394700 | 0.68036100  | 2.54329100  |
| C  | -4.22276200 | -0.76798400 | -0.30511600 |
| C  | -5.33874100 | -0.21283700 | -0.90094800 |
| C  | -5.57554500 | -0.47424200 | -2.24927000 |
| C  | -4.66015600 | -1.26161400 | -2.93355600 |
| C  | -3.52377400 | -1.77982500 | -2.30043500 |
| N  | -3.31706000 | -1.53447100 | -0.97158300 |
| B  | 0.61630500  | -2.92924100 | 0.72415900  |
| B  | -0.63385800 | -2.96918600 | -0.55120500 |
| B  | -2.13384300 | -2.10559900 | -0.05461900 |
| B  | -0.41850700 | -4.35458900 | 0.58739000  |
| B  | -2.03820800 | -3.87339900 | 0.07532100  |
| B  | -0.13727100 | -3.66924400 | 2.22270100  |
| B  | -1.82808000 | -4.49046400 | 1.69110000  |
| B  | -2.84342000 | -3.00679500 | 1.35309200  |
| P  | 2.22179200  | -0.49795400 | -0.24747500 |
| P  | -0.80356300 | 1.45921900  | 0.31074300  |
| S  | -1.81041200 | -3.03584900 | 2.99364600  |
| Rh | -0.06664100 | -0.84590700 | 0.07498100  |
| H  | -2.69190200 | 3.71289400  | -4.63818800 |
| H  | -2.22394200 | 1.27824500  | -4.42166200 |
| H  | 0.45209900  | -2.45355100 | 1.90987400  |
| H  | 1.76922800  | -3.20196700 | 0.60814300  |
| H  | -0.31935500 | -3.23485000 | -1.67015300 |
| H  | 1.19430200  | 0.78291100  | -2.60167900 |
| H  | 1.88280500  | 2.70573700  | -3.99350900 |

|   |             |             |             |
|---|-------------|-------------|-------------|
| H | -1.76645900 | -1.17868100 | 0.70716100  |
| H | 3.83789700  | 4.09673400  | -3.31934900 |
| H | 0.08372400  | -5.38007500 | 0.24371900  |
| H | -2.71524300 | -4.48666900 | -0.69637500 |
| H | 5.09077500  | 3.53044500  | -1.24535300 |
| H | 0.55188700  | -4.20685900 | 3.03073300  |
| H | 4.40496300  | 1.61008900  | 0.13815000  |
| H | -2.20709300 | -5.55026800 | 2.07136600  |
| H | -4.02163200 | -3.01183900 | 1.55261900  |
| H | 2.43572400  | 1.52215900  | 1.88110600  |
| H | 3.49951700  | 1.55483000  | 4.09293100  |
| H | 4.81230800  | -0.41146300 | 4.88660300  |
| H | 5.04311400  | -2.40483300 | 3.41404900  |
| H | 3.99364000  | -2.43499100 | 1.18841600  |
| H | 5.13391300  | -0.81969000 | -0.73130500 |
| H | 6.45492900  | -2.26289400 | -2.22469200 |
| H | 5.31911000  | -3.93281300 | -3.68115900 |
| H | 2.83972200  | -4.14279700 | -3.60753600 |
| H | 1.51848300  | -2.71446300 | -2.08422600 |
| H | -0.50469800 | 2.43361400  | 3.10899500  |
| H | 0.88383200  | 4.15584700  | 4.16881100  |
| H | 2.40177700  | 5.57381900  | 2.79174300  |
| H | 2.50507300  | 5.21718200  | 0.32679200  |
| H | 1.12870700  | 3.49088000  | -0.73784300 |
| H | -1.48771800 | 4.30574000  | -0.55760500 |
| H | -2.31901200 | 5.21727900  | -2.69310700 |
| H | -1.37322700 | 0.36602700  | -2.26257600 |
| H | -3.41965700 | 3.02051400  | 0.32930000  |
| H | -5.32786100 | 3.03472900  | 1.88405000  |
| H | -5.33856600 | 1.54055400  | 3.87520400  |
| H | -3.39969400 | 0.02869100  | 4.28763500  |
| H | -1.49899800 | -0.00503300 | 2.71834500  |
| H | -4.02075000 | -0.62822200 | 0.74631500  |
| H | -6.00687200 | 0.39563100  | -0.30259500 |
| H | -6.45093700 | -0.07660500 | -2.75401400 |
| H | -4.80427000 | -1.48715900 | -3.98458100 |
| C | -2.53956200 | -2.57570400 | -3.10229700 |
| H | -1.54951800 | -2.11332100 | -3.07214500 |
| H | -2.42146700 | -3.58778200 | -2.70824500 |
| H | -2.87772100 | -2.63404500 | -4.14019400 |

**Table S6.** [6,6-(PPh<sub>3</sub>)<sub>2</sub>-9-(2-Etpy)-arachno-6,5-RhSB<sub>8</sub>H<sub>9</sub>] (**5**) (-3111.59429238)

|    | <b>x</b>    | <b>y</b>    | <b>z</b>    |
|----|-------------|-------------|-------------|
| Rh | 0.05182300  | -0.07539100 | -0.88077000 |
| B  | -1.07256600 | -1.89415200 | -1.71479700 |
| B  | -2.89343000 | -1.95515000 | -1.36531300 |
| B  | -3.32315600 | 0.86096000  | -2.07260400 |
| B  | -3.66779100 | -0.79859500 | -2.43138200 |



|   |             |             |             |
|---|-------------|-------------|-------------|
| B | -2.24098500 | -1.68019400 | -3.02698400 |
| B | -2.51735000 | 0.00510700  | -3.47583100 |
| B | -0.84142500 | -0.62498600 | -2.90882600 |
| P | 1.54622300  | -1.67805700 | -0.08396300 |
| P | 0.81779700  | 1.96249300  | 0.17641700  |
| S | -1.44271200 | 1.22924700  | -2.30059000 |
| B | -3.67804900 | -0.32187000 | -0.75376400 |
| C | -6.15681000 | 0.20663600  | -0.88346000 |
| H | -5.86187500 | 0.64341100  | -1.82621400 |
| C | -7.47001000 | 0.24124400  | -0.44916500 |
| H | -8.22417100 | 0.70710900  | -1.07365800 |
| C | -7.77843500 | -0.32288900 | 0.78579500  |
| H | -8.79586000 | -0.31807000 | 1.16549900  |
| C | -6.75151000 | -0.89363600 | 1.52985000  |
| H | -6.96425900 | -1.33973000 | 2.49273300  |
| C | -5.43731500 | -0.91057100 | 1.05524600  |
| N | -5.15365200 | -0.35596400 | -0.16454900 |
| H | -4.75839900 | -1.08829500 | -2.82531500 |
| H | -2.66461000 | 0.38074400  | -4.59302200 |
| H | -2.33847100 | -2.49531200 | -3.89139500 |
| H | -0.01873300 | -0.58766300 | -3.77053900 |
| H | -4.01345700 | 1.80315300  | -2.32572200 |
| H | -3.37903800 | -3.00710600 | -1.07475300 |
| H | -0.53491600 | -2.95532700 | -1.68471000 |
| H | -2.90931400 | -0.04212400 | 0.10853700  |
| H | -1.81059800 | -1.73346700 | -0.63216200 |
| C | -4.31271000 | -1.52948200 | 1.84940800  |
| H | -3.77441500 | -2.22203400 | 1.19271300  |
| H | -3.58447100 | -0.74229100 | 2.08343600  |
| C | -4.73009800 | -2.24493300 | 3.13740600  |
| H | -5.18691700 | -1.56338900 | 3.86407500  |
| H | -5.43332300 | -3.06229100 | 2.94209300  |
| H | -3.84549300 | -2.68113400 | 3.61063300  |
| C | 0.70397900  | -3.05144600 | 0.84887000  |
| C | 0.96540100  | -4.41249300 | 0.64190000  |
| C | -0.24171100 | -2.69379900 | 1.82438900  |
| C | 0.30962100  | -5.38823500 | 1.39737900  |
| H | 1.67470500  | -4.71984400 | -0.11844100 |
| C | -0.87785100 | -3.66685800 | 2.59589100  |
| H | -0.48689800 | -1.64517800 | 1.97064300  |
| C | -0.60603700 | -5.02035200 | 2.38284100  |
| H | 0.51858600  | -6.43867100 | 1.21207600  |
| H | -1.58817500 | -3.36774600 | 3.36266400  |
| H | -1.10883500 | -5.78014100 | 2.97540800  |
| C | 0.97804300  | 2.19781600  | 2.01380900  |
| C | 1.05232600  | 3.47742100  | 2.59466500  |
| C | 0.98161300  | 1.08228500  | 2.85940500  |
| C | 1.15187500  | 3.62794700  | 3.97761900  |
| H | 1.01689500  | 4.36114600  | 1.96481100  |
| C | 1.07884100  | 1.23080700  | 4.24511000  |

|   |             |             |             |
|---|-------------|-------------|-------------|
| H | 0.91317200  | 0.09131400  | 2.42969000  |
| C | 1.16690400  | 2.50368400  | 4.80755600  |
| H | 1.20959300  | 4.62467100  | 4.40752900  |
| H | 1.08602800  | 0.34927300  | 4.88063900  |
| H | 1.24012800  | 2.62231000  | 5.88553600  |
| C | 2.91610900  | -1.24015600 | 1.10912700  |
| C | 3.90267300  | -0.33710800 | 0.67871300  |
| C | 3.03114600  | -1.78798100 | 2.39596600  |
| C | 4.96337000  | 0.01583000  | 1.51243600  |
| H | 3.84948900  | 0.08892200  | -0.31792800 |
| C | 4.09321700  | -1.43151500 | 3.23229100  |
| H | 2.29576300  | -2.50137400 | 2.75198100  |
| C | 5.06148900  | -0.52820400 | 2.79516900  |
| H | 5.71078000  | 0.71936200  | 1.15617600  |
| H | 4.16315600  | -1.86947500 | 4.22499600  |
| H | 5.88754000  | -0.25274600 | 3.44563700  |
| C | -0.28031200 | 3.42122300  | -0.18704600 |
| C | 0.11961700  | 4.51785000  | -0.96134900 |
| C | -1.58417800 | 3.40659200  | 0.33784400  |
| C | -0.76101000 | 5.57767000  | -1.20085300 |
| H | 1.11908200  | 4.55240600  | -1.38161700 |
| C | -2.45800500 | 4.46628800  | 0.10401100  |
| H | -1.91964200 | 2.55651900  | 0.92613900  |
| C | -2.04874200 | 5.55740700  | -0.66782400 |
| H | -0.43371500 | 6.41880200  | -1.80660600 |
| H | -3.46256300 | 4.43690900  | 0.51791000  |
| H | -2.73205500 | 6.38141500  | -0.85547400 |
| C | 2.44352100  | 2.52322800  | -0.51945700 |
| C | 2.69420700  | 2.21681500  | -1.86872200 |
| C | 3.42048900  | 3.21954100  | 0.20599200  |
| C | 3.88564700  | 2.61130800  | -2.47925900 |
| H | 1.95574100  | 1.64901900  | -2.42946500 |
| C | 4.61736800  | 3.60450300  | -0.40387300 |
| C | 4.85244700  | 3.30473700  | -1.74679400 |
| H | 4.06116900  | 2.36704400  | -3.52356900 |
| H | 5.36676600  | 4.13879800  | 0.17483300  |
| H | 5.78448200  | 3.60473100  | -2.21862700 |
| C | 2.58403400  | -2.55857900 | -1.35448600 |
| C | 2.29404200  | -2.42916000 | -2.71876100 |
| C | 3.68685900  | -3.34518000 | -0.97309500 |
| C | 3.07567200  | -3.07880100 | -3.67803700 |
| H | 1.45895000  | -1.81552400 | -3.03026300 |
| C | 4.46271500  | -3.99756900 | -1.93100400 |
| H | 3.94807200  | -3.44355600 | 0.07605300  |
| C | 4.15855600  | -3.86612200 | -3.28834300 |
| H | 2.83278100  | -2.96436000 | -4.73115300 |
| H | 5.30922200  | -4.60258700 | -1.61612000 |
| H | 4.76658100  | -4.37033100 | -4.03514600 |
| H | 3.25964500  | 3.45238800  | 1.25310800  |

**Table S7.** [6,6-(PPh<sub>3</sub>)<sub>2</sub>-9-(py)-*arachno*-6,5-RhSB<sub>8</sub>H<sub>9</sub>] (**6a**) (-3032.96576796)

|    | x           | y           | z           |
|----|-------------|-------------|-------------|
| Rh | -0.16799100 | -0.36872800 | -0.69943300 |
| B  | -1.05207100 | -2.46984800 | -0.92379300 |
| B  | -2.84872800 | -2.63539700 | -0.49411300 |
| B  | -3.64908700 | -0.21395900 | -1.95822800 |
| B  | -3.76959100 | -1.94054300 | -1.80896200 |
| B  | -2.24899300 | -2.78263600 | -2.19041900 |
| B  | -2.73806400 | -1.33822500 | -3.08524200 |
| B  | -0.98793400 | -1.58317700 | -2.44047300 |
| P  | 1.71467800  | -1.43539700 | 0.13636700  |
| P  | 0.26735100  | 1.88198000  | -0.02041000 |
| S  | -1.82859300 | 0.29885600  | -2.35146100 |
| B  | -3.81348600 | -0.98482900 | -0.34976600 |
| C  | -6.38793000 | -0.94954900 | -0.37369500 |
| H  | -6.27333900 | -0.83747800 | -1.44288200 |
| C  | -7.63186700 | -0.98347200 | 0.24162400  |
| H  | -8.52439600 | -0.90362000 | -0.36937900 |
| C  | -7.70806100 | -1.11184100 | 1.62770000  |
| H  | -8.66934600 | -1.14067500 | 2.13135300  |
| C  | -6.51900900 | -1.19912800 | 2.35393400  |
| H  | -6.52044800 | -1.29932200 | 3.43388300  |
| C  | -5.30962600 | -1.16268100 | 1.67831400  |
| N  | -5.23745400 | -1.04247300 | 0.33169900  |
| H  | -4.82248700 | -2.45596000 | -2.04500000 |
| H  | -2.94156300 | -1.32007500 | -4.25532900 |
| H  | -2.25617600 | -3.81559000 | -2.78515500 |
| H  | -0.17784600 | -1.69533600 | -3.30381300 |
| H  | -4.46920000 | 0.50521000  | -2.44785800 |
| H  | -3.20905800 | -3.58306200 | 0.13804100  |
| H  | -0.38250300 | -3.39565000 | -0.58908100 |
| H  | -3.08485000 | -0.40149700 | 0.39150800  |
| H  | -1.80498800 | -2.07448800 | 0.08853500  |
| H  | -4.35639500 | -1.23237500 | 2.18712100  |
| C  | 0.29342400  | 2.27362100  | 1.79419600  |
| C  | 0.15340800  | 1.22589300  | 2.71404500  |
| C  | 0.35453600  | 3.59110700  | 2.28027300  |
| C  | 0.10725300  | 1.47972000  | 4.08772100  |
| H  | 0.06989100  | 0.20875100  | 2.34370600  |
| C  | 0.31732300  | 3.84568000  | 3.65130000  |
| H  | 0.41372700  | 4.42288700  | 1.58438500  |
| C  | 0.19725200  | 2.78962000  | 4.55918700  |
| H  | -0.00012700 | 0.65209000  | 4.78426100  |
| H  | 0.37095800  | 4.87012700  | 4.01070200  |
| H  | 0.16273000  | 2.99038200  | 5.62689800  |
| C  | -1.01591900 | 3.12349700  | -0.54860200 |
| C  | -0.72447900 | 4.28324500  | -1.27942600 |
| C  | -2.34669200 | 2.88358400  | -0.16672700 |
| C  | -1.73986100 | 5.18324600  | -1.61730300 |

|   |             |             |             |
|---|-------------|-------------|-------------|
| H | 0.29394500  | 4.49029000  | -1.59007100 |
| C | -3.35613700 | 3.78545500  | -0.49838600 |
| H | -2.59516800 | 1.97868100  | 0.38098800  |
| C | -3.05585400 | 4.93965500  | -1.22656600 |
| H | -1.49597900 | 6.07596900  | -2.18769000 |
| H | -4.38024600 | 3.58071000  | -0.19756000 |
| H | -3.84382000 | 5.63977900  | -1.49151800 |
| C | 3.24782500  | -0.45248900 | 0.57152200  |
| C | 3.36304900  | 0.12566000  | 1.84785700  |
| C | 4.29798900  | -0.25780800 | -0.33781100 |
| C | 4.49409600  | 0.85897400  | 2.20646900  |
| H | 2.57555800  | -0.01069700 | 2.58057400  |
| C | 5.42876700  | 0.47989800  | 0.01971900  |
| H | 4.25020700  | -0.69805300 | -1.32704000 |
| C | 5.53516000  | 1.03704400  | 1.29361800  |
| H | 4.56146600  | 1.28478700  | 3.20449500  |
| H | 6.23067900  | 0.60998900  | -0.70233300 |
| H | 6.42018700  | 1.60267200  | 1.57347800  |
| C | 2.39078300  | -2.61761200 | -1.12776500 |
| C | 2.74531100  | -3.94531500 | -0.85275800 |
| C | 2.52784400  | -2.14542800 | -2.44436700 |
| C | 3.24353900  | -4.77159300 | -1.86330600 |
| H | 2.62115900  | -4.35002600 | 0.14508300  |
| C | 3.04110000  | -2.96596600 | -3.44864500 |
| H | 2.20840000  | -1.13536300 | -2.68317800 |
| C | 3.40108500  | -4.28402700 | -3.16046700 |
| H | 3.50333800  | -5.80154300 | -1.63230200 |
| H | 3.14030400  | -2.58007000 | -4.45978000 |
| H | 3.78865600  | -4.92917000 | -3.94457000 |
| C | 1.81262400  | 2.60498900  | -0.73740900 |
| C | 2.76166600  | 3.34693700  | -0.02297800 |
| C | 2.02392600  | 2.38250600  | -2.11063200 |
| C | 3.88643800  | 3.86841800  | -0.66835200 |
| H | 2.63751000  | 3.51167600  | 1.04147400  |
| C | 3.13909100  | 2.91594700  | -2.75546900 |
| H | 1.30824400  | 1.78736400  | -2.67244900 |
| C | 4.07466800  | 3.66293900  | -2.03466000 |
| H | 4.61636200  | 4.43528200  | -0.09627600 |
| H | 3.27971400  | 2.74265500  | -3.81928000 |
| H | 4.94758600  | 4.07452300  | -2.53467200 |
| C | 1.57667200  | -2.45226200 | 1.69020300  |
| C | 2.70824400  | -3.01536700 | 2.30816500  |
| C | 0.32593700  | -2.64763100 | 2.29061000  |
| C | 2.58579900  | -3.76398700 | 3.47858100  |
| H | 3.69254600  | -2.86117100 | 1.87670600  |
| C | 0.20174500  | -3.39191000 | 3.46688200  |
| H | -0.55397800 | -2.21275200 | 1.82999900  |
| C | 1.33033000  | -3.95508500 | 4.06169600  |
| H | 3.47218200  | -4.19425700 | 3.93759500  |
| H | -0.77926300 | -3.53334200 | 3.91308600  |

|   |            |             |            |
|---|------------|-------------|------------|
| H | 1.23572800 | -4.53645600 | 4.97520100 |
|---|------------|-------------|------------|

**Table S8.** [9,9-(PPh<sub>3</sub>)<sub>2</sub>-8-(py)-*arachno*-9,6-RhSB<sub>8</sub>H<sub>9</sub>] (**6b**) (-3032.96436392)

|    | x           | y           | z           |
|----|-------------|-------------|-------------|
| C  | -4.72444500 | -1.40884100 | 3.26286300  |
| C  | -4.89264000 | -0.82715100 | 2.00434100  |
| C  | -3.63825900 | -2.26018900 | 3.46267800  |
| C  | -3.99201100 | -1.12325700 | 0.99418900  |
| C  | -2.75877300 | -2.50189200 | 2.41556400  |
| H  | -5.42582600 | -1.20493400 | 4.06612900  |
| H  | -5.72097500 | -0.15964900 | 1.79408900  |
| H  | -3.46108500 | -2.73769500 | 4.42039300  |
| H  | -1.88925500 | -3.13832900 | 2.51421400  |
| H  | -3.97382800 | -3.39088800 | -1.32099000 |
| H  | -2.17449100 | -4.73718000 | 0.63950200  |
| H  | -1.81179200 | -1.25463500 | -0.70824500 |
| H  | 0.11717000  | -3.21236200 | 1.38497900  |
| H  | -1.94392300 | -5.63514700 | -2.24116100 |
| H  | 0.55195500  | -5.25319500 | -0.75348000 |
| H  | 0.28663100  | -2.22187000 | -2.24868700 |
| H  | 1.88037100  | -2.82959100 | -1.23473900 |
| H  | 0.46312700  | -3.88048500 | -3.48615000 |
| N  | -2.93301900 | -1.94395600 | 1.19536700  |
| B  | -1.97109000 | -2.28674700 | -0.00218700 |
| B  | -2.79125200 | -3.22157400 | -1.29353400 |
| B  | -1.69012100 | -4.03279700 | -0.19684700 |
| B  | -0.33968200 | -2.99615500 | 0.29695500  |
| B  | -1.65082000 | -4.55119200 | -1.85304600 |
| B  | -0.11403000 | -4.28378700 | -0.94845500 |
| B  | 0.70066000  | -2.72798700 | -1.13395000 |
| B  | -0.17032600 | -3.48466700 | -2.55882600 |
| P  | -0.97384700 | 1.44830900  | -0.35439600 |
| P  | 2.14569900  | -0.39901700 | 0.28226000  |
| S  | -2.00480700 | -3.05925400 | -3.06193800 |
| Rh | -0.09911100 | -0.80518400 | -0.20743200 |
| H  | -4.08835900 | -0.72291500 | -0.00714300 |
| C  | -2.53384700 | 1.45727200  | -1.37702700 |
| C  | -3.62704800 | 2.29716500  | -1.11079300 |
| C  | -2.61421500 | 0.58357300  | -2.47464000 |
| C  | -4.76647300 | 2.26129800  | -1.91829800 |
| H  | -3.59784900 | 2.98016600  | -0.26863800 |
| C  | -3.74880000 | 0.55551800  | -3.28802200 |
| H  | -1.79268900 | -0.09628800 | -2.68264100 |
| C  | -4.83056300 | 1.39325100  | -3.01003000 |
| H  | -5.60438000 | 2.91606800  | -1.69206100 |
| H  | -3.78774700 | -0.13340600 | -4.12701400 |
| H  | -5.71860500 | 1.36552900  | -3.63580600 |
| C  | 0.01963000  | 2.76343000  | -1.21886600 |

|   |             |             |             |
|---|-------------|-------------|-------------|
| C | 0.97957600  | 3.51343600  | -0.51819200 |
| C | -0.10735900 | 2.96847700  | -2.60254100 |
| C | 1.78046600  | 4.44377400  | -1.18231000 |
| H | 1.10110800  | 3.38214700  | 0.55091400  |
| C | 0.69933500  | 3.89525700  | -3.26501500 |
| H | -0.84623800 | 2.41287300  | -3.17030800 |
| C | 1.64606800  | 4.63743600  | -2.55788100 |
| H | 2.51301200  | 5.01443000  | -0.61774900 |
| H | 0.57918900  | 4.04032500  | -4.33554200 |
| H | 2.27191700  | 5.36108200  | -3.07328400 |
| C | -1.53412700 | 2.30362300  | 1.19796900  |
| C | -1.68894800 | 3.69471200  | 1.31473800  |
| C | -1.85462600 | 1.50091900  | 2.30364000  |
| C | -2.14702900 | 4.26385100  | 2.50503700  |
| H | -1.44247300 | 4.33942800  | 0.47701000  |
| C | -2.31940600 | 2.06769200  | 3.49191500  |
| H | -1.71645200 | 0.42520300  | 2.23106400  |
| C | -2.46447400 | 3.45256400  | 3.59657200  |
| H | -2.25465900 | 5.34296200  | 2.57821800  |
| H | -2.56028400 | 1.42729500  | 4.33663400  |
| H | -2.81849200 | 3.89751600  | 4.52284700  |
| C | 3.27145800  | -0.12955600 | -1.15976000 |
| C | 4.67261700  | -0.20455000 | -1.06946200 |
| C | 2.69495100  | 0.19354800  | -2.39646900 |
| C | 5.47140100  | 0.04273000  | -2.18686900 |
| H | 5.14349300  | -0.46966700 | -0.12779600 |
| C | 3.49432500  | 0.44372900  | -3.51342000 |
| H | 1.61319100  | 0.23797900  | -2.47816100 |
| C | 4.88375100  | 0.36851500  | -3.41141500 |
| H | 6.55281400  | -0.02488400 | -2.10085700 |
| H | 3.02841600  | 0.69032600  | -4.46356500 |
| H | 5.50683300  | 0.55634800  | -4.28193000 |
| C | 2.48912500  | 1.06450200  | 1.38276200  |
| C | 1.59362100  | 1.30995200  | 2.43588800  |
| C | 3.58967000  | 1.92202500  | 1.23337400  |
| C | 1.79476300  | 2.36808800  | 3.32382100  |
| H | 0.72037300  | 0.67587300  | 2.54720600  |
| C | 3.79020200  | 2.98458200  | 2.11766300  |
| H | 4.28774800  | 1.77697600  | 0.41698200  |
| C | 2.89669600  | 3.21072600  | 3.16663000  |
| H | 1.08091600  | 2.54013000  | 4.12481300  |
| H | 4.64783500  | 3.63875100  | 1.98187700  |
| H | 3.05489300  | 4.03972000  | 3.85147500  |
| C | 2.99533500  | -1.73974700 | 1.26529000  |
| C | 3.75278900  | -2.74728600 | 0.64633600  |
| C | 2.82882600  | -1.79921000 | 2.65825300  |
| C | 4.32833500  | -3.77395500 | 1.39714200  |
| H | 3.89790200  | -2.73871100 | -0.42688100 |
| C | 3.40227800  | -2.82646000 | 3.40751400  |
| H | 2.25633400  | -1.03639600 | 3.17405100  |

|   |            |             |            |
|---|------------|-------------|------------|
| C | 4.15549700 | -3.81959500 | 2.78004400 |
| H | 4.90875400 | -4.54162800 | 0.89237400 |
| H | 3.26049500 | -2.84630600 | 4.48514300 |
| H | 4.60247800 | -4.62050500 | 3.36299300 |

**Table S9.** [6,6-(PPh<sub>3</sub>)<sub>2</sub>-9-(3-Mepy)-*arachno*-6,5-RhSB<sub>8</sub>H<sub>9</sub>] (**7a**) (-3072.28449727)

|    | x           | y           | z           |
|----|-------------|-------------|-------------|
| Rh | 0.00169500  | -0.30299300 | -0.80991300 |
| B  | -0.95135200 | -2.34925800 | -1.20301800 |
| B  | -2.77957900 | -2.44951100 | -0.91084700 |
| B  | -3.36383000 | 0.07045500  | -2.30678500 |
| B  | -3.57032700 | -1.65334400 | -2.25270100 |
| B  | -2.06318500 | -2.54782600 | -2.56587300 |
| B  | -2.42252200 | -1.04283500 | -3.42033700 |
| B  | -0.73605100 | -1.39718600 | -2.66479900 |
| P  | 1.75281100  | -1.49637000 | 0.13444800  |
| P  | 0.47252100  | 1.88896500  | 0.01732500  |
| S  | -1.49743100 | 0.51415000  | -2.54501500 |
| B  | -3.68115200 | -0.76448700 | -0.75505800 |
| C  | -6.24047100 | -0.59850100 | -0.95550400 |
| H  | -6.04816700 | -0.42847600 | -2.00561900 |
| C  | -7.52188500 | -0.60935900 | -0.42061800 |
| H  | -8.37019500 | -0.44967200 | -1.07741200 |
| C  | -7.69423300 | -0.81698200 | 0.94443100  |
| C  | -6.57126700 | -1.00994600 | 1.76204000  |
| C  | -5.32397500 | -0.98717200 | 1.14891700  |
| N  | -5.15216100 | -0.78997600 | -0.17978800 |
| H  | -4.62419000 | -2.10760800 | -2.58870500 |
| H  | -2.53763900 | -0.96129500 | -4.59975700 |
| H  | -2.07054000 | -3.55127400 | -3.20912200 |
| H  | 0.12962100  | -1.50948100 | -3.47264900 |
| H  | -4.11167900 | 0.84976100  | -2.81957400 |
| H  | -3.22468100 | -3.40744700 | -0.35216500 |
| H  | -0.34895300 | -3.31931000 | -0.86582700 |
| H  | -2.98193700 | -0.25219300 | 0.06314700  |
| H  | -1.75680500 | -1.96597800 | -0.22833600 |
| H  | -4.40934300 | -1.13361900 | 1.71079000  |
| C  | 0.38400200  | 2.19145600  | 1.84755900  |
| C  | 0.12645700  | 1.11125900  | 2.70239000  |
| C  | 0.47316800  | 3.48006900  | 2.40244700  |
| C  | -0.00623000 | 1.30365700  | 4.08039900  |
| H  | 0.02033300  | 0.11694400  | 2.27974500  |
| C  | 0.34984400  | 3.67276600  | 3.77851600  |
| H  | 0.62206400  | 4.33931000  | 1.75497400  |
| C  | 0.11347600  | 2.58363700  | 4.62215500  |
| H  | -0.20353100 | 0.45123600  | 4.72548100  |
| H  | 0.42726500  | 4.67543300  | 4.19108900  |
| H  | 0.01222400  | 2.73615500  | 5.69360900  |

|   |             |             |             |
|---|-------------|-------------|-------------|
| C | -0.71279900 | 3.21504100  | -0.53424300 |
| C | -0.31492500 | 4.40550300  | -1.15833900 |
| C | -2.07957000 | 3.01192600  | -0.27973900 |
| C | -1.26125300 | 5.37091300  | -1.51523900 |
| H | 0.73334200  | 4.58635400  | -1.37101300 |
| C | -3.02060500 | 3.97830700  | -0.63069100 |
| H | -2.41000200 | 2.08580700  | 0.18212000  |
| C | -2.61431200 | 5.16266500  | -1.25078300 |
| H | -0.93444600 | 6.28663400  | -2.00148900 |
| H | -4.07389900 | 3.80057100  | -0.43017000 |
| H | -3.34856000 | 5.91352800  | -1.53073100 |
| C | 3.29062400  | -0.60330100 | 0.71902000  |
| C | 3.34104500  | -0.07592500 | 2.02120100  |
| C | 4.40927000  | -0.42383400 | -0.10868600 |
| C | 4.47488900  | 0.59235400  | 2.48384300  |
| H | 2.49879000  | -0.20103100 | 2.69214100  |
| C | 5.54251500  | 0.24947000  | 0.35271900  |
| H | 4.41218100  | -0.82553700 | -1.11548100 |
| C | 5.58351000  | 0.75572500  | 1.65146700  |
| H | 4.49048800  | 0.97937300  | 3.49968000  |
| H | 6.39742400  | 0.36916800  | -0.30767600 |
| H | 6.46999100  | 1.27094100  | 2.01234300  |
| C | 2.47768900  | -2.67410000 | -1.10786000 |
| C | 2.78080000  | -4.01533000 | -0.83669800 |
| C | 2.71586100  | -2.18078100 | -2.40173200 |
| C | 3.32704100  | -4.83478000 | -1.82765700 |
| H | 2.57889900  | -4.43567400 | 0.14179300  |
| C | 3.27700000  | -2.99498000 | -3.38554900 |
| H | 2.43600000  | -1.15926400 | -2.64022800 |
| C | 3.58499500  | -4.32683600 | -3.10073900 |
| H | 3.54566100  | -5.87517800 | -1.60073300 |
| H | 3.45393500  | -2.59268300 | -4.37952300 |
| H | 4.00989300  | -4.96667700 | -3.86972400 |
| C | 2.09387700  | 2.57560600  | -0.55293000 |
| C | 3.02238400  | 3.23796000  | 0.25979900  |
| C | 2.38778300  | 2.41193400  | -1.91929200 |
| C | 4.20784200  | 3.74140300  | -0.28349100 |
| H | 2.83444900  | 3.35398900  | 1.32133400  |
| C | 3.56404600  | 2.92734900  | -2.46184700 |
| H | 1.68828000  | 1.87614400  | -2.55637400 |
| C | 4.47833600  | 3.59653800  | -1.64377000 |
| H | 4.92039600  | 4.24665400  | 0.36337600  |
| H | 3.76860000  | 2.80068500  | -3.52184400 |
| H | 5.39847200  | 3.99441000  | -2.06388300 |
| C | 1.44095400  | -2.55253300 | 1.63732900  |
| C | 2.49272800  | -3.17192400 | 2.33715800  |
| C | 0.13467400  | -2.72628800 | 2.11410900  |
| C | 2.24052500  | -3.95210200 | 3.46561200  |
| H | 3.51709500  | -3.03670200 | 2.00418800  |
| C | -0.11974900 | -3.50347800 | 3.24740900  |



|   |             |             |            |
|---|-------------|-------------|------------|
| H | -0.68667700 | -2.24823300 | 1.59238200 |
| C | 0.93150700  | -4.12129300 | 3.92404900 |
| H | 3.06782300  | -4.42443100 | 3.98906000 |
| H | -1.14178700 | -3.62716100 | 3.59620000 |
| H | 0.73550200  | -4.72775900 | 4.80452400 |
| H | -8.69104200 | -0.82778900 | 1.37748800 |
| C | -6.69636100 | -1.24142000 | 3.24746000 |
| H | -7.26760200 | -2.15353200 | 3.45660100 |
| H | -5.71538600 | -1.34445300 | 3.71999600 |
| H | -7.21917400 | -0.40952100 | 3.73357700 |

**Table S10.** [9,9-(PPh<sub>3</sub>)<sub>2</sub>-8-(3-Mepy)-*arachno*-9,6-RhSB<sub>8</sub>H<sub>9</sub>] (**7b**) (-3072.28309155)

|    | x           | y           | z           |
|----|-------------|-------------|-------------|
| C  | -5.09329900 | -1.26343800 | 2.49147300  |
| C  | -5.04918400 | -0.39766000 | 1.39925900  |
| C  | -4.17148200 | -2.31399600 | 2.57904900  |
| C  | -4.10267800 | -0.60007200 | 0.40826000  |
| C  | -3.23548700 | -2.43746800 | 1.55435000  |
| H  | -5.74954000 | 0.42473800  | 1.30274700  |
| H  | -2.47636200 | -3.20929400 | 1.55827100  |
| H  | -4.18389500 | -2.32112500 | -2.34350400 |
| H  | -2.77869500 | -4.30869300 | -0.61828300 |
| H  | -1.81939200 | -0.71800500 | -1.14309900 |
| H  | -0.38828600 | -3.34914400 | 0.58701000  |
| H  | -2.40624900 | -4.61646100 | -3.60037200 |
| H  | -0.03109500 | -4.93647800 | -1.91371900 |
| H  | 0.26464900  | -1.65545700 | -2.71964100 |
| H  | 1.65781600  | -2.70299500 | -1.76762900 |
| H  | 0.33130500  | -3.02880700 | -4.27983700 |
| N  | -3.20173100 | -1.60619000 | 0.48747400  |
| B  | -2.18302600 | -1.83850700 | -0.68987800 |
| B  | -2.99735800 | -2.34670600 | -2.20492500 |
| B  | -2.12698900 | -3.52764600 | -1.24699500 |
| B  | -0.70072400 | -2.83716800 | -0.45187600 |
| B  | -2.00546500 | -3.69332500 | -2.96882200 |
| B  | -0.53613400 | -3.85667100 | -1.93486500 |
| B  | 0.49908800  | -2.44241700 | -1.72147200 |
| B  | -0.32798900 | -2.74255100 | -3.33048900 |
| P  | -0.63111600 | 1.70152100  | -0.20799600 |
| P  | 2.09145100  | -0.72315100 | 0.30265500  |
| S  | -2.03327200 | -1.94916000 | -3.84351900 |
| Rh | -0.11278100 | -0.65430600 | -0.45264600 |
| H  | -4.03585300 | 0.02340900  | -0.47431400 |
| C  | -2.02141900 | 2.15834000  | -1.36324400 |
| C  | -3.01266400 | 3.10245000  | -1.05034400 |
| C  | -2.06936800 | 1.53190600  | -2.62015200 |
| C  | -4.01935400 | 3.40974300  | -1.96887700 |
| H  | -3.00862600 | 3.60033000  | -0.08671500 |

|   |             |             |             |
|---|-------------|-------------|-------------|
| C | -3.06854500 | 1.84816700  | -3.54266300 |
| H | -1.33284900 | 0.77398800  | -2.87162500 |
| C | -4.04883600 | 2.78761300  | -3.21833700 |
| H | -4.78057300 | 4.13965400  | -1.70479200 |
| H | -3.08526800 | 1.34515300  | -4.50530700 |
| H | -4.83347700 | 3.02761000  | -3.93087500 |
| C | 0.64405500  | 2.97512100  | -0.67333800 |
| C | 1.58702200  | 3.42261700  | 0.26768300  |
| C | 0.74567300  | 3.44410700  | -1.99340900 |
| C | 2.59418700  | 4.31582400  | -0.10103200 |
| H | 1.53489200  | 3.08441000  | 1.29634300  |
| C | 1.75724400  | 4.33328100  | -2.36047700 |
| H | 0.02733700  | 3.12619000  | -2.74178900 |
| C | 2.68540000  | 4.77380600  | -1.41613500 |
| H | 3.30949300  | 4.64861600  | 0.64634100  |
| H | 1.81228000  | 4.68640400  | -3.38704900 |
| H | 3.47127800  | 5.46780400  | -1.70206900 |
| C | -1.26413900 | 2.33271900  | 1.42199000  |
| C | -1.25979100 | 3.68771100  | 1.79306500  |
| C | -1.80705200 | 1.39773500  | 2.31600000  |
| C | -1.78372400 | 4.09187500  | 3.02282500  |
| H | -0.83658100 | 4.43114600  | 1.12486100  |
| C | -2.33765800 | 1.80075900  | 3.54306100  |
| H | -1.79260300 | 0.34480300  | 2.04721000  |
| C | -2.32533500 | 3.15033800  | 3.90081400  |
| H | -1.76697700 | 5.14420500  | 3.29446300  |
| H | -2.75304900 | 1.05912000  | 4.22061400  |
| H | -2.73058700 | 3.46685400  | 4.85836800  |
| C | 3.41168500  | -0.36385900 | -0.94107800 |
| C | 4.76421100  | -0.69516600 | -0.74774800 |
| C | 3.04224300  | 0.29084900  | -2.12441500 |
| C | 5.71957000  | -0.37248900 | -1.71257200 |
| H | 5.07203500  | -1.21895700 | 0.15220100  |
| C | 3.99850300  | 0.61627400  | -3.08804300 |
| H | 1.99638500  | 0.53324000  | -2.28718000 |
| C | 5.33861200  | 0.28531600  | -2.88451700 |
| H | 6.76032700  | -0.64078300 | -1.55043900 |
| H | 3.69265600  | 1.12143900  | -4.00015500 |
| H | 6.08282800  | 0.53163200  | -3.63738000 |
| C | 2.49833300  | 0.42167700  | 1.71360600  |
| C | 1.52415700  | 0.60200900  | 2.70821100  |
| C | 3.71996900  | 1.09798100  | 1.84890200  |
| C | 1.76275400  | 1.42261100  | 3.81216700  |
| H | 0.56435500  | 0.10699400  | 2.60308500  |
| C | 3.95941200  | 1.92294500  | 2.95015900  |
| H | 4.48588700  | 0.99806800  | 1.08853200  |
| C | 2.98430800  | 2.08740500  | 3.93603100  |
| H | 0.98777600  | 1.55248100  | 4.56277100  |
| H | 4.91178700  | 2.44047600  | 3.03405200  |
| H | 3.17297300  | 2.73203900  | 4.79053000  |

|   |             |             |             |
|---|-------------|-------------|-------------|
| C | 2.61976800  | -2.35152600 | 1.04516500  |
| C | 3.26400100  | -3.33760500 | 0.28033600  |
| C | 2.31515400  | -2.64705400 | 2.38362200  |
| C | 3.59641600  | -4.57309800 | 0.83873400  |
| H | 3.51001600  | -3.14874600 | -0.75733300 |
| C | 2.64578900  | -3.88268600 | 2.94025700  |
| H | 1.82494800  | -1.90907200 | 3.00890000  |
| C | 3.28854300  | -4.85249900 | 2.16988300  |
| H | 4.09377500  | -5.31856600 | 0.22399200  |
| H | 2.40210400  | -4.08338200 | 3.98056700  |
| H | 3.54654900  | -5.81550100 | 2.60253200  |
| H | -5.83891000 | -1.12610400 | 3.27036200  |
| C | -4.18139400 | -3.29353500 | 3.72652100  |
| H | -5.04173200 | -3.97019700 | 3.65415200  |
| H | -3.27658200 | -3.90784600 | 3.73492000  |
| H | -4.25230500 | -2.77630800 | 4.68981000  |

**Table S11.** [6,6-(PPh<sub>3</sub>)<sub>2</sub>-9-(4-Mepy)-*arachno*-6,5-RhSB<sub>8</sub>H<sub>9</sub>] (**8a**) (-3072.28585866)

|    | x           | y           | z           |
|----|-------------|-------------|-------------|
| Rh | 0.03506700  | -0.32640200 | -0.76675900 |
| B  | -0.92771300 | -2.37978900 | -1.09644600 |
| B  | -2.74959200 | -2.47332300 | -0.76305800 |
| B  | -3.36235900 | 0.01924400  | -2.19448900 |
| B  | -3.56820900 | -1.70293900 | -2.10249000 |
| B  | -2.06873100 | -2.60462500 | -2.43068700 |
| B  | -2.44632600 | -1.11632200 | -3.30688300 |
| B  | -0.74403400 | -1.45761000 | -2.58228800 |
| P  | 1.80345600  | -1.50254000 | 0.16533100  |
| P  | 0.52617100  | 1.88377200  | -0.00159900 |
| S  | -1.50215800 | 0.45678200  | -2.48296900 |
| B  | -3.64668900 | -0.78574700 | -0.62058900 |
| C  | -6.21325000 | -0.61603800 | -0.77137200 |
| H  | -6.04043100 | -0.45756300 | -1.82698700 |
| C  | -7.48634600 | -0.61455400 | -0.22266300 |
| H  | -8.33680300 | -0.45574700 | -0.87832100 |
| C  | -7.66858000 | -0.80573600 | 1.15204300  |
| C  | -6.50873500 | -0.98404000 | 1.91952100  |
| H  | -6.57010600 | -1.13091800 | 2.99336600  |
| C  | -5.26415900 | -0.97862700 | 1.31468500  |
| N  | -5.10651500 | -0.80093100 | -0.01746000 |
| H  | -4.62998700 | -2.16213600 | -2.40610100 |
| H  | -2.58766400 | -1.05803500 | -4.48487400 |
| H  | -2.09005300 | -3.62037900 | -3.05414500 |
| H  | 0.10443300  | -1.58612200 | -3.40586800 |
| H  | -4.12092800 | 0.78858100  | -2.70685700 |
| H  | -3.18275200 | -3.42107600 | -0.17801600 |
| H  | -0.31730700 | -3.34314300 | -0.75426000 |
| H  | -2.93258200 | -0.25586500 | 0.17337100  |

|   |             |             |             |
|---|-------------|-------------|-------------|
| H | -1.71220500 | -1.97937200 | -0.11084200 |
| H | -4.34766300 | -1.11817800 | 1.87436200  |
| C | 0.47432100  | 2.23261600  | 1.82166500  |
| C | 0.24540800  | 1.17274300  | 2.70933100  |
| C | 0.56483300  | 3.53576400  | 2.34112600  |
| C | 0.14131600  | 1.39944700  | 4.08459900  |
| H | 0.13867100  | 0.16732500  | 2.31413800  |
| C | 0.47016800  | 3.76284100  | 3.71420700  |
| H | 0.69208400  | 4.37897100  | 1.66844300  |
| C | 0.26179500  | 2.69393000  | 4.59047000  |
| H | -0.03485800 | 0.56240800  | 4.75541100  |
| H | 0.54794100  | 4.77638600  | 4.09922800  |
| H | 0.18253200  | 2.87325200  | 5.65962400  |
| C | -0.67130600 | 3.19499400  | -0.56203000 |
| C | -0.29026000 | 4.36110500  | -1.23995200 |
| C | -2.03039700 | 3.00432300  | -0.26050200 |
| C | -1.24533600 | 5.31551500  | -1.60329700 |
| H | 0.75157800  | 4.53132100  | -1.48963000 |
| C | -2.97983300 | 3.96003600  | -0.61763400 |
| H | -2.34818300 | 2.09583700  | 0.24352800  |
| C | -2.59020400 | 5.12042500  | -1.29158600 |
| H | -0.93167800 | 6.21233700  | -2.13161800 |
| H | -4.02697600 | 3.79252400  | -0.37958100 |
| H | -3.33126600 | 5.86275200  | -1.57632900 |
| C | 3.35549600  | -0.59855100 | 0.69377600  |
| C | 3.43834900  | -0.04404800 | 1.98297900  |
| C | 4.45259500  | -0.43566600 | -0.16545400 |
| C | 4.58277800  | 0.63450400  | 2.40261300  |
| H | 2.61371400  | -0.15558400 | 2.67782500  |
| C | 5.59637600  | 0.24789000  | 0.25273900  |
| H | 4.43016800  | -0.85835700 | -1.16332000 |
| C | 5.66972300  | 0.78125700  | 1.53915000  |
| H | 4.62365000  | 1.04274900  | 3.40940500  |
| H | 6.43403200  | 0.35441100  | -0.43158400 |
| H | 6.56438400  | 1.30464400  | 1.86652200  |
| C | 2.49815900  | -2.71099800 | -1.06497900 |
| C | 2.80287400  | -4.04664800 | -0.76918900 |
| C | 2.70990000  | -2.24920400 | -2.37510600 |
| C | 3.32457200  | -4.89128700 | -1.75216600 |
| H | 2.62102300  | -4.44347900 | 0.22294700  |
| C | 3.24669400  | -3.08850000 | -3.35137600 |
| H | 2.42850200  | -1.23256000 | -2.63214400 |
| C | 3.55632900  | -4.41453700 | -3.04219500 |
| H | 3.54461400  | -5.92687700 | -1.50545200 |
| H | 3.40338200  | -2.71018900 | -4.35809500 |
| H | 3.96222200  | -5.07385500 | -3.80496800 |
| C | 2.13636200  | 2.55592700  | -0.61937200 |
| C | 3.07630400  | 3.24286400  | 0.15909500  |
| C | 2.40896900  | 2.35320300  | -1.98484400 |
| C | 4.25228200  | 3.73177100  | -0.41692400 |

|   |             |             |             |
|---|-------------|-------------|-------------|
| H | 2.90432200  | 3.38960400  | 1.21952800  |
| C | 3.57565800  | 2.85449900  | -2.56051600 |
| H | 1.70055000  | 1.79794500  | -2.59480300 |
| C | 4.50160400  | 3.54795700  | -1.77654900 |
| H | 4.97401000  | 4.25647600  | 0.20377300  |
| H | 3.76380500  | 2.69758100  | -3.61951400 |
| H | 5.41442300  | 3.93453700  | -2.22239400 |
| C | 1.52330200  | -2.52253600 | 1.69897100  |
| C | 2.58924100  | -3.12863800 | 2.38896200  |
| C | 0.22782300  | -2.68087400 | 2.20955300  |
| C | 2.36097500  | -3.88105400 | 3.54105500  |
| H | 3.60598400  | -3.00469200 | 2.02932600  |
| C | -0.00250300 | -3.43003000 | 3.36667500  |
| H | -0.60440200 | -2.21274200 | 1.69605800  |
| C | 1.06243500  | -4.03490500 | 4.03348800  |
| H | 3.19880700  | -4.34363900 | 4.05640700  |
| H | -1.01654600 | -3.54183200 | 3.74177300  |
| H | 0.88520600  | -4.61957300 | 4.93249300  |
| C | -9.03971900 | -0.83984800 | 1.77340500  |
| H | -9.41558200 | -1.87061000 | 1.81646900  |
| H | -9.02470500 | -0.45451300 | 2.79776900  |
| H | -9.75745900 | -0.25314500 | 1.19210600  |

**Table S12.** [9,9-(PPh<sub>3</sub>)<sub>2</sub>-8-(4-Mepy)-*arachno*-9,6-RhSB<sub>8</sub>H<sub>9</sub>] (**8b**) (-3072.28428584)

|   | <b>x</b>    | <b>y</b>    | <b>z</b>    |
|---|-------------|-------------|-------------|
| C | -5.11061900 | -1.27029600 | 2.46259100  |
| C | -5.05309200 | -0.60326700 | 1.22877800  |
| C | -4.09507500 | -2.19691200 | 2.72269100  |
| C | -4.04365200 | -0.88660300 | 0.32792200  |
| C | -3.09597900 | -2.42844800 | 1.78785400  |
| H | -5.80410200 | 0.13223300  | 0.95805700  |
| H | -4.07159100 | -2.74671000 | 3.65845200  |
| H | -2.28759300 | -3.12772900 | 1.95784800  |
| H | -3.85855700 | -3.00130800 | -2.11818300 |
| H | -2.40499900 | -4.58441700 | -0.04849900 |
| H | -1.66587600 | -1.05772400 | -1.09446000 |
| H | -0.14368700 | -3.26308100 | 1.07925500  |
| H | -1.86595300 | -5.31631200 | -2.93319500 |
| H | 0.43948800  | -5.19546200 | -1.12772900 |
| H | 0.55249500  | -2.06916700 | -2.43207200 |
| H | 1.96117500  | -2.84527900 | -1.27015800 |
| H | 0.78179400  | -3.65715300 | -3.74846300 |
| N | -3.06746600 | -1.78634200 | 0.59925800  |
| B | -1.97892000 | -2.11810500 | -0.48741200 |
| B | -2.68150700 | -2.91178400 | -1.93165700 |
| B | -1.77829300 | -3.86369700 | -0.76842300 |
| B | -0.44582700 | -2.95122400 | -0.03923200 |
| B | -1.56120400 | -4.27999900 | -2.43818400 |

|    |             |             |             |
|----|-------------|-------------|-------------|
| B  | -0.13640800 | -4.17257700 | -1.33615000 |
| B  | 0.78670200  | -2.66838100 | -1.31096400 |
| B  | 0.06017900  | -3.27573000 | -2.88135800 |
| P  | -0.69425600 | 1.56019500  | -0.44603100 |
| P  | 2.17258700  | -0.55858500 | 0.46269600  |
| S  | -1.66749700 | -2.69727700 | -3.57578900 |
| Rh | -0.00567700 | -0.76066500 | -0.35507300 |
| H  | -3.98199100 | -0.40900800 | -0.64188100 |
| C  | -2.07475000 | 1.75989100  | -1.68452500 |
| C  | -3.12805400 | 2.67472200  | -1.52745500 |
| C  | -2.05029100 | 0.96085300  | -2.84019000 |
| C  | -4.12731900 | 2.78413500  | -2.49741800 |
| H  | -3.17807700 | 3.30315000  | -0.64485900 |
| C  | -3.04344400 | 1.07802600  | -3.81483800 |
| H  | -1.26073100 | 0.22590400  | -2.96931800 |
| C  | -4.08729400 | 1.98914400  | -3.64446500 |
| H  | -4.93769600 | 3.49465900  | -2.35436800 |
| H  | -3.00431700 | 0.44420900  | -4.69619400 |
| H  | -4.86658800 | 2.07479400  | -4.39707600 |
| C  | 0.49911900  | 2.85999600  | -1.03612800 |
| C  | 1.39704900  | 3.46391700  | -0.13939300 |
| C  | 0.58817700  | 3.19507100  | -2.39707500 |
| C  | 2.34885400  | 4.37877900  | -0.59191500 |
| H  | 1.35215000  | 3.23012700  | 0.91828500  |
| C  | 1.54563700  | 4.10578900  | -2.84766800 |
| H  | -0.09721700 | 2.75327800  | -3.11279400 |
| C  | 2.42946500  | 4.70187000  | -1.94737200 |
| H  | 3.02994900  | 4.83518800  | 0.12139000  |
| H  | 1.59285000  | 4.35314000  | -3.90509600 |
| H  | 3.17303500  | 5.41252900  | -2.29820100 |
| C  | -1.42780600 | 2.34037800  | 1.07356800  |
| C  | -1.51643300 | 3.72705400  | 1.27893500  |
| C  | -1.95224300 | 1.48447600  | 2.05395400  |
| C  | -2.11230500 | 4.23973100  | 2.43323900  |
| H  | -1.11054300 | 4.41097300  | 0.54012900  |
| C  | -2.55408400 | 1.99542500  | 3.20552800  |
| H  | -1.86455400 | 0.41042100  | 1.91299500  |
| C  | -2.63406300 | 3.37605900  | 3.39892900  |
| H  | -2.16688900 | 5.31565600  | 2.57764700  |
| H  | -2.95058100 | 1.31444100  | 3.95441300  |
| H  | -3.09456600 | 3.77730600  | 4.29800300  |
| C  | 3.49182000  | -0.22225000 | -0.78879000 |
| C  | 4.86423600  | -0.39299400 | -0.53526600 |
| C  | 3.09452400  | 0.24833500  | -2.04818100 |
| C  | 5.81045600  | -0.09299500 | -1.51627800 |
| H  | 5.19624300  | -0.77536000 | 0.42517000  |
| C  | 4.04134700  | 0.55172100  | -3.02819700 |
| H  | 2.03467900  | 0.36485300  | -2.25397200 |
| C  | 5.40086200  | 0.38132300  | -2.76469200 |
| H  | 6.86730400  | -0.23583200 | -1.30620700 |

|   |             |             |             |
|---|-------------|-------------|-------------|
| H | 3.71369000  | 0.91454200  | -3.99857700 |
| H | 6.13876400  | 0.61023700  | -3.52917200 |
| C | 2.43519800  | 0.76631800  | 1.74733500  |
| C | 1.40930300  | 0.98277100  | 2.68100100  |
| C | 3.59829700  | 1.54460100  | 1.84589500  |
| C | 1.54167200  | 1.93788400  | 3.69057500  |
| H | 0.49147500  | 0.40969600  | 2.60132100  |
| C | 3.73115500  | 2.50395700  | 2.85229000  |
| H | 4.40103800  | 1.41874000  | 1.12870100  |
| C | 2.70585100  | 2.70326600  | 3.77903800  |
| H | 0.72778000  | 2.09209600  | 4.39389000  |
| H | 4.63959400  | 3.09853100  | 2.90840700  |
| H | 2.81118500  | 3.45226600  | 4.55956500  |
| C | 2.81602000  | -2.03622900 | 1.40321000  |
| C | 3.60774300  | -3.02131100 | 0.79139700  |
| C | 2.45266400  | -2.22024200 | 2.74696000  |
| C | 4.02806400  | -4.14628800 | 1.50341700  |
| H | 3.90086100  | -2.91853900 | -0.24620800 |
| C | 2.87080600  | -3.34545500 | 3.45712300  |
| H | 1.84531300  | -1.47950400 | 3.25520500  |
| C | 3.66184000  | -4.31439600 | 2.83834300  |
| H | 4.63928900  | -4.89409000 | 1.00522900  |
| H | 2.57777900  | -3.46123500 | 4.49756000  |
| H | 3.98804100  | -5.19162500 | 3.39076500  |
| C | -6.22408600 | -1.01032400 | 3.44263200  |
| H | -6.40392100 | 0.06371400  | 3.56337100  |
| H | -7.16193000 | -1.45737000 | 3.08869700  |
| H | -6.00234300 | -1.43656200 | 4.42521500  |

## 2. Kinetic studies of the reaction between **1** and 2-Mepy

**Table S13.** Reaction of **1** with 5 equivalents of 2-Mepy at 298 K in CD<sub>2</sub>Cl<sub>2</sub>. The change in the concentration of **1** with time was monitored by <sup>1</sup>H-<sup>11</sup>B NMR spectroscopy, using the solvent residual signal as internal standard.

| t (min) | [ <b>1</b> ] | ln(C/Co) |
|---------|--------------|----------|
| 0.0     | 0.04000      | 0.00000  |
| 0.8     | 0.03893      | -0.02714 |
| 1.6     | 0.03846      | -0.03936 |
| 2.4     | 0.03749      | -0.06470 |
| 3.1     | 0.03652      | -0.09103 |
| 3.9     | 0.03601      | -0.10518 |
| 4.7     | 0.03565      | -0.11507 |
| 5.5     | 0.03477      | -0.14013 |
| 6.3     | 0.03380      | -0.16830 |
| 7.1     | 0.03342      | -0.17968 |
| 7.8     | 0.03237      | -0.21158 |
| 8.6     | 0.03179      | -0.22978 |
| 9.4     | 0.03109      | -0.25193 |
| 10.2    | 0.03097      | -0.25592 |
| 11.0    | 0.02999      | -0.28810 |
| 11.8    | 0.02921      | -0.31420 |
| 12.5    | 0.02878      | -0.32923 |
| 13.3    | 0.02812      | -0.35246 |
| 14.1    | 0.02733      | -0.38099 |
| 14.9    | 0.02737      | -0.37926 |
| 15.7    | 0.02659      | -0.40832 |
| 16.5    | 0.02602      | -0.43008 |
| 17.2    | 0.02562      | -0.44560 |
| 18.0    | 0.02493      | -0.47292 |
| 18.8    | 0.02443      | -0.49309 |
| 19.6    | 0.02395      | -0.51271 |
| 20.4    | 0.02364      | -0.52588 |
| 21.2    | 0.02337      | -0.53764 |
| 21.9    | 0.02290      | -0.55757 |
| 22.7    | 0.02220      | -0.58867 |
| 23.5    | 0.02149      | -0.62122 |
| 24.3    | 0.02152      | -0.61984 |
| 25.1    | 0.02129      | -0.63084 |
| 25.9    | 0.02069      | -0.65945 |
| 26.6    | 0.01992      | -0.69702 |
| 27.4    | 0.01963      | -0.71202 |
| 28.2    | 0.01934      | -0.72662 |
| 29.0    | 0.01881      | -0.75452 |
| 29.8    | 0.01822      | -0.78625 |
| 30.6    | 0.01813      | -0.79150 |



|      |         |          |
|------|---------|----------|
| 31.3 | 0.01786 | -0.80654 |
| 32.1 | 0.01767 | -0.81673 |
| 32.9 | 0.01675 | -0.87057 |
| 33.7 | 0.01654 | -0.88303 |
| 34.5 | 0.01605 | -0.91297 |
| 35.3 | 0.01568 | -0.93657 |
| 36.0 | 0.01574 | -0.93294 |
| 36.8 | 0.01518 | -0.96897 |
| 37.6 | 0.01441 | -1.02091 |
| 38.4 | 0.01453 | -1.01257 |
| 39.2 | 0.01409 | -1.04365 |
| 40.0 | 0.01369 | -1.07220 |
| 40.7 | 0.01357 | -1.08137 |
| 41.5 | 0.01351 | -1.08510 |
| 42.3 | 0.01315 | -1.11230 |
| 43.1 | 0.01277 | -1.14179 |
| 43.9 | 0.01263 | -1.15284 |
| 44.7 | 0.01251 | -1.16208 |
| 45.4 | 0.01225 | -1.18352 |
| 46.2 | 0.01184 | -1.21778 |
| 47.0 | 0.01141 | -1.25408 |
| 47.8 | 0.01148 | -1.24790 |
| 48.6 | 0.01068 | -1.32078 |
| 49.4 | 0.01048 | -1.33987 |
| 50.1 | 0.01051 | -1.33666 |
| 50.9 | 0.01056 | -1.33197 |
| 51.7 | 0.01004 | -1.38198 |
| 52.5 | 0.00998 | -1.38833 |
| 53.3 | 0.00960 | -1.42716 |
| 54.1 | 0.00968 | -1.41844 |
| 54.8 | 0.00900 | -1.49193 |

**Table S14.** Reaction of **1** with 7 equivalents of 2-Mepy at 298 K in CD<sub>2</sub>Cl<sub>2</sub>. The change in the concentration of **1** with time was monitored by <sup>1</sup>H-<sup>11</sup>B NMR spectroscopy, using the solvent residual signal as internal standard.

| t (min) | [ <b>1</b> ] | ln(C/Co) |
|---------|--------------|----------|
| 0.0     | 0.040        | 0.000    |
| 0.9     | 0.036        | 0.126    |
| 1.8     | 0.033        | 0.048    |
| 2.7     | 0.029        | -0.124   |
| 3.5     | 0.025        | -0.262   |
| 4.4     | 0.024        | -0.281   |
| 5.3     | 0.022        | -0.410   |
| 6.2     | 0.019        | -0.445   |
| 7.1     | 0.018        | -0.551   |

|      |       |        |
|------|-------|--------|
| 8.0  | 0.016 | -0.645 |
| 8.8  | 0.015 | -0.713 |
| 9.7  | 0.011 | -1.019 |
| 10.6 | 0.013 | -0.915 |
| 11.5 | 0.011 | -1.022 |
| 12.4 | 0.011 | -1.088 |
| 13.3 | 0.009 | -1.249 |
| 14.1 | 0.007 | -1.460 |
| 15.0 | 0.009 | -1.277 |
| 15.9 | 0.007 | -1.458 |
| 16.8 | 0.006 | -1.719 |
| 17.7 | 0.006 | -1.743 |
| 18.6 | 0.005 | -1.825 |
| 19.4 | 0.004 | -2.140 |
| 20.3 | 0.006 | -1.706 |
| 21.2 | 0.002 | -2.803 |
| 22.1 | 0.004 | -2.194 |
| 23.0 | 0.003 | -2.515 |

**Table S15.** Reaction of **1** with 10 equivalents of 2-Mepy at 298 K in CD<sub>2</sub>Cl<sub>2</sub>. The change in the concentration of **1** with time was monitored by <sup>1</sup>H-<sup>11</sup>B} NMR spectroscopy, using the solvent residual signal as internal standard.

| t (min) | [ <b>1</b> ] | ln(C/Co) |
|---------|--------------|----------|
| 0.0     | 0.040        | 0.000    |
| 0.9     | 0.038        | -0.043   |
| 1.7     | 0.038        | -0.051   |
| 2.6     | 0.034        | -0.157   |
| 3.5     | 0.034        | -0.156   |
| 4.3     | 0.032        | -0.225   |
| 5.2     | 0.029        | -0.307   |
| 6.1     | 0.031        | -0.258   |
| 6.9     | 0.029        | -0.317   |
| 7.8     | 0.028        | -0.372   |
| 8.7     | 0.029        | -0.334   |
| 9.5     | 0.026        | -0.447   |
| 10.4    | 0.023        | -0.550   |
| 11.3    | 0.022        | -0.599   |
| 12.1    | 0.020        | -0.669   |
| 13.0    | 0.022        | -0.604   |
| 13.9    | 0.023        | -0.557   |
| 14.7    | 0.021        | -0.621   |
| 15.6    | 0.018        | -0.794   |
| 16.5    | 0.016        | -0.911   |
| 17.3    | 0.016        | -0.942   |

|      |       |        |
|------|-------|--------|
| 18.2 | 0.016 | -0.934 |
| 19.1 | 0.014 | -1.045 |
| 19.9 | 0.017 | -0.872 |
| 20.8 | 0.013 | -1.116 |
| 21.7 | 0.014 | -1.068 |
| 22.5 | 0.011 | -1.268 |
| 23.4 | 0.013 | -1.163 |
| 24.3 | 0.010 | -1.379 |
| 25.1 | 0.010 | -1.399 |
| 26.0 | 0.007 | -1.678 |

**Table S16.** Reaction of **1** with 15 equivalents of 2-Mepy at 298 K in CD<sub>2</sub>Cl<sub>2</sub>. The change in the concentration of **1** with time was monitored by <sup>1</sup>H-<sup>11</sup>B NMR spectroscopy, using the solvent residual signal as internal standard.

| t (min) | [ <b>1</b> ] | ln(C/C <sub>0</sub> ) |
|---------|--------------|-----------------------|
| 0.0     | 0.04000      | 0.00000               |
| 0.8     | 0.03853      | -0.03740              |
| 1.6     | 0.03666      | -0.08710              |
| 2.4     | 0.03579      | -0.11121              |
| 3.1     | 0.03625      | -0.09833              |
| 3.9     | 0.03398      | -0.16321              |
| 4.7     | 0.03330      | -0.18343              |
| 5.5     | 0.03210      | -0.22013              |
| 6.3     | 0.03050      | -0.27128              |
| 7.1     | 0.02842      | -0.34184              |
| 7.8     | 0.02878      | -0.32926              |
| 8.6     | 0.02590      | -0.43457              |
| 9.4     | 0.02466      | -0.48355              |
| 10.2    | 0.02506      | -0.46774              |
| 11.0    | 0.02207      | -0.59478              |
| 11.8    | 0.02296      | -0.55492              |
| 12.5    | 0.02012      | -0.68721              |
| 13.3    | 0.01932      | -0.72751              |
| 14.1    | 0.01916      | -0.73617              |
| 14.9    | 0.01716      | -0.84618              |
| 15.7    | 0.01594      | -0.92020              |
| 16.5    | 0.01451      | -1.01387              |
| 17.2    | 0.01318      | -1.11005              |
| 18.0    | 0.01625      | -0.90108              |
| 18.8    | 0.01311      | -1.11514              |
| 19.6    | 0.01237      | -1.17361              |
| 20.4    | 0.01225      | -1.18304              |
| 21.2    | 0.01048      | -1.33924              |
| 21.9    | 0.01042      | -1.34520              |

|       |         |          |
|-------|---------|----------|
| 22.7  | 0.01030 | -1.35670 |
| 23.5  | 0.01157 | -1.24007 |
| 24.3  | 0.00915 | -1.47466 |
| 25.1  | 0.00866 | -1.53039 |
| 25.85 | 0.00762 | -1.65808 |
| 26.6  | 0.00722 | -1.71185 |
| 27.4  | 0.00672 | -1.78439 |
| 28.2  | 0.00940 | -1.44832 |
| 29.0  | 0.00639 | -1.83486 |
| 29.8  | 0.00645 | -1.82488 |
| 30.6  | 0.00540 | -2.00274 |
| 31.3  | 0.00446 | -2.19340 |
| 32.1  | 0.00475 | -2.13153 |
| 32.9  | 0.00403 | -2.29558 |
| 33.7  | 0.00377 | -2.36241 |

**Table S17.** Reaction of **1** with 15 equivalents of 2-Mepy at 298 K in CD<sub>2</sub>Cl<sub>2</sub>. The change in the concentration of **1** with time was monitored by <sup>1</sup>H-<sup>11</sup>B NMR spectroscopy, using the solvent residual signal as internal standard.

| t (min) | [ <b>3</b> ] | ln(C/Co) |
|---------|--------------|----------|
| 0.0     | 0.0400       | 0.0000   |
| 0.7     | 0.0372       | -0.0736  |
| 1.4     | 0.0350       | -0.1322  |
| 2.1     | 0.0334       | -0.1817  |
| 2.8     | 0.0313       | -0.2461  |
| 3.5     | 0.0301       | -0.2829  |
| 4.2     | 0.0289       | -0.3265  |
| 4.9     | 0.0262       | -0.4235  |
| 5.6     | 0.0252       | -0.4628  |
| 6.3     | 0.0239       | -0.5163  |
| 7.0     | 0.0223       | -0.5839  |
| 7.7     | 0.0220       | -0.5986  |
| 8.4     | 0.0210       | -0.6434  |
| 9.1     | 0.0195       | -0.7209  |
| 9.8     | 0.0188       | -0.7553  |
| 10.5    | 0.0181       | -0.7909  |
| 11.2    | 0.0166       | -0.8772  |
| 11.9    | 0.0160       | -0.9162  |
| 12.6    | 0.0151       | -0.9739  |
| 13.3    | 0.0148       | -0.9930  |
| 14      | 0.0136       | -1.0813  |
| 14.7    | 0.0129       | -1.1346  |
| 15.4    | 0.0125       | -1.1647  |
| 16.1    | 0.0111       | -1.2808  |
| 16.8    | 0.0110       | -1.2895  |

---

|      |        |         |
|------|--------|---------|
| 17.5 | 0.0102 | -1.3651 |
| 18.2 | 0.0098 | -1.4087 |
| 18.9 | 0.0091 | -1.4762 |
| 19.6 | 0.0085 | -1.5452 |
| 20.3 | 0.0080 | -1.6053 |
| 21   | 0.0082 | -1.5789 |
| 21.7 | 0.0072 | -1.7210 |
| 22.4 | 0.0067 | -1.7886 |
| 23.1 | 0.0064 | -1.8342 |
| 23.8 | 0.0059 | -1.9165 |
| 24.5 | 0.0056 | -1.9611 |
| 25.2 | 0.0058 | -1.9240 |
| 25.9 | 0.0006 | -2.0229 |

---
